# Supplementary material for: Glycaemic, blood pressure and low-density lipoprotein-cholesterol control among patients with diabetes mellitus in a specialised clinic in Botswana: a cross-sectional study
Source: PubMed Central journal article supplement — BMJ Open. 2019 Jul 23;9(7):e026807. doi: 10.1136/bmjopen-2018-026807 (PMC6661581; doi:10.1136/bmjopen-2018-026807), 2019-07-23
Supplement: bmjopen-2018-026807.draft_revisions.pdf [file bmjopen-2018-026807.draft_revisions.pdf]

# BMJ Open

BMJ Open is committed to open peer review. As part of this commitment we make the peer review history of every article we publish publicly available.

When an article is published we post the peer reviewers' comments and the authors' responses online. We also post the versions of the paper that were used during peer review. These are the versions that the peer review comments apply to.

The versions of the paper that follow are the versions that were submitted during the peer review process. They are not the versions of record or the final published versions. They should not be cited or distributed as the published version of this manuscript.

BMJ Open is an open access journal and the full, final, typeset and author-corrected version of record of the manuscript is available on our site with no access controls, subscription charges or pay-per-view fees (<http://bmjopen.bmj.com>).

If you have any questions on BMJ Open's open peer review process please email [info.bmjopen@bmj.com](mailto:info.bmjopen@bmj.com)

# BMJ Open

## Glycaemic, blood pressure and low-density lipoprotein-cholesterol control among patients with diabetes mellitus in a specialised clinic in Botswana

|                               |                                                                                                                                                                                                                                                                                                                                                                                                                                                                                                                                                                                                                                                                                                                                                                                                                                                                                                                                                                                                                                                         |
|-------------------------------|---------------------------------------------------------------------------------------------------------------------------------------------------------------------------------------------------------------------------------------------------------------------------------------------------------------------------------------------------------------------------------------------------------------------------------------------------------------------------------------------------------------------------------------------------------------------------------------------------------------------------------------------------------------------------------------------------------------------------------------------------------------------------------------------------------------------------------------------------------------------------------------------------------------------------------------------------------------------------------------------------------------------------------------------------------|
| Journal:                      | <i>BMJ Open</i>                                                                                                                                                                                                                                                                                                                                                                                                                                                                                                                                                                                                                                                                                                                                                                                                                                                                                                                                                                                                                                         |
| Manuscript ID                 | bmjopen-2018-026807                                                                                                                                                                                                                                                                                                                                                                                                                                                                                                                                                                                                                                                                                                                                                                                                                                                                                                                                                                                                                                     |
| Article Type:                 | Research                                                                                                                                                                                                                                                                                                                                                                                                                                                                                                                                                                                                                                                                                                                                                                                                                                                                                                                                                                                                                                                |
| Date Submitted by the Author: | 20-Sep-2018                                                                                                                                                                                                                                                                                                                                                                                                                                                                                                                                                                                                                                                                                                                                                                                                                                                                                                                                                                                                                                             |
| Complete List of Authors:     | Mwita, Julius; University of Botswana, Internal medicine; Princess Marina Hospital, Internal Medicine<br>Francis, Joel; Wits Health Consortium Pty Ltd, Wits Reproductive Health & HIV Institute; Harvard University T H Chan School of Public Health, Global Health<br>Omech, Bernard; University of Botswana, Internal Medicine; Princess Marina Hospital, Internal Medicine<br>Botsile, Elizabeth; University of Botswana, Internal Medicine; Princess Marina Hospital, Internal Medicine<br>Oyewo, Aderonke ; Princess Marina Hospital, Internal Medicine<br>Mokgwathi, Matshidiso ; University of Botswana, Internal medicine; Princess Marina Hospital, Internal Medicine<br>Molefe-Baikai , Onkabetse ; University of Botswana, Internal medicine; Princess Marina Hospital, Internal Medicine<br>Godman, Brian; University of Liverpool , Liverpool Health Economics; Karolinska Universitetssjukhuset, Laboratory Medicine, Division of Clinical Pharmacology<br>Tshikuka, Jose- Gaby; University of Botswana, Family Medicine & Public Health |
| Keywords:                     | Glycemic, Botswana, LDL, Hypertension < CARDIOLOGY, Diabetes Mellitus                                                                                                                                                                                                                                                                                                                                                                                                                                                                                                                                                                                                                                                                                                                                                                                                                                                                                                                                                                                   |

SCHOLARONE™  
Manuscripts

1  
2  
3 **Glycaemic, blood pressure and low-density lipoprotein-cholesterol control among patients with**  
4 **diabetes mellitus in a specialised clinic in Botswana**  
5

6 Julius Chacha Mwita<sup>1,2\*</sup>, Joel Msafiri Francis<sup>3,4</sup>, Bernard Omech<sup>1,2</sup>, Elizabeth Botsile<sup>1,2</sup>, Aderonke  
7 Oyewo<sup>2</sup>, Matshidiso Mokgwathi<sup>1,2</sup>, Onkabetse Julia Molefe-Baikai<sup>1,2</sup>, Brian Godman<sup>5,6</sup>, Jose Gaby  
8 Tshikuka<sup>7</sup>  
9  
10

11 **Authors' affiliations**

12 <sup>1</sup>Department of Internal Medicine, Faculty of Medicine, University of Botswana, Gaborone,  
13 Botswana

14 <sup>2</sup>Department of Medicine, Princess Marina Hospital, Gaborone, Botswana

15 <sup>3</sup>Wits Health Consortium, Wits Reproductive Health & HIV Institute, Johannesburg, South  
16 Africa

17 <sup>4</sup> Department of Global Health, Harvard University T H Chan School of Public Health,  
18 Boston, MA, USA

19 <sup>5</sup>Department of Laboratory Medicine, Division of Clinical Pharmacology, Karolinska  
20 Institutet, Karolinska University Hospital Huddinge, Stockholm, Sweden

21 <sup>6</sup> Liverpool Health Economics, University of Liverpool, Liverpool, UK

22 <sup>7</sup>Department of Family Medicine and Public Health, Faculty of Medicine, University of  
23 Botswana, Gaborone, Botswana  
24  
25  
26  
27

28 **Correspondence to**

29 **Dr Julius Chacha Mwita;**

30 University of Botswana, Faculty of Medicine,

31 Private Bag 00713, Gaborone, Botswana

32 Phone: +26773078658

33 Email: [mwitajc@ub.ac.bw](mailto:mwitajc@ub.ac.bw)  
34  
35  
36  
37  
38  
39  
40  
41  
42  
43  
44  
45  
46  
47  
48  
49  
50  
51  
52  
53  
54  
55  
56  
57

## **Abstract**

**Objective:** Control of glycaemic, hypertension and low-density lipoprotein-cholesterol (LDL-C) among type 2 diabetes mellitus (T2DM) patients is vital for the prevention of cardiovascular diseases (CVD). This study aimed to determine the prevalence of optimal glycaemic, hypertension, and LDL-C control among ambulant patients with type 2 diabetes mellitus in Botswana. Also, the research aimed at assessing factors associated with optimal glycaemic, hypertension and LDL-C therapeutic goals.

**Design:** A cross-sectional study.

**Setting:** A specialised public outpatient clinic in Gaborone, Botswana.

**Participants:** 500 T2DM patients on treatment for 3 or more months between August 2017 and February 2018.

**Primary outcome measure:** the prevalence of optimal glycaemic (HbA1c <7 %), hypertension (blood pressure <140/90mmHg) and LDL-C (<1.8mmol/L) control.

**Results:** The proportions of patients meeting optimal targets were 32.3% for glycaemic, 54.2% for hypertension, and 20.4% for LDL-C. Optimal glycaemic control was positively associated with age  $\geq$  50 years (AOR 5.79; 95% CI 1.08 to 31.14) but was inversely associated with an increase in diabetes duration (AOR 0.91; 95%CI 0.85 – 0.98). Patients on angiotensin converting inhibitors (ACEIs) had lower odds of optimal hypertension control (AOR 0.35; 95% CI 0.14 – 0.85) than those without ACEIs. Being female (AOR 0.21; 95% CI 0.08 – 0.58) was inversely associated with an optimal LDL-C control.

**Conclusion:** T2DM in Gaborone, Botswana, presented with poor control of recommended glycaemic, hypertension and LDL-C control. These finds calls for urgent individual and health systems interventions to address key determinants of the recommended therapeutic targets among patients with diabetes in this setting.

**Keywords:** Glycemic, hypertension, LDL, Diabetes Mellitus, Botswana

### **Strengths and limitations of this study**

- The study provides data on the three critical therapeutic targets in patients with diabetes in a specialised public clinic in Botswana.
- We explored factors associated with glycaemic, hypertension and LDL-C control.
- The study was limited to one public clinic and may not be generalised to other facilities in the country. However, the findings can be used as a basis for future studies and efforts to improve diabetes care in Botswana and different settings in Africa.
- The cross-sectional design limited the assessment of the temporal relationship between factors associated with poor control of glycaemic, LDL-C and hypertension.

## **Introduction**

Diabetes mellitus and related cardiovascular complications are growing public health concerns worldwide<sup>1,2</sup>. There are approximately 16 million people with diabetes in Africa, and this number is projected to increase to 41 million by 2045 due to rapid urbanisation, lifestyles changes and nutrition transition in the continent<sup>1</sup>. This increase in prevalence and incidence of diabetes is attributable to type 2 diabetes, which is associated with multiple co-morbidities such as obesity and hypertension requiring chronic care and catastrophic health expenditure<sup>1</sup>. Diabetes and associated comorbidities are known to increase patients risk to the development of cardiovascular diseases (CVD), which are responsible for about 70% of diabetes-related deaths<sup>3</sup>. The risk to the development of CVD is higher in people with suboptimal glycaemic, hypertension and LDL-C control<sup>3,4</sup>. A reduction of HbA1c to control targets along with optimal hypertension control and the use of statins to lower LDL-C levels have been shown to improve long-term outcomes including reducing mortality among patients with diabetes<sup>5-8</sup>. Achieving these targets remains a challenge in most settings, especially in settings with limited access to standard diabetes care<sup>9-13</sup>. Only a minority of patients with diabetes in Africa achieve optimal therapeutic targets, leaving the majority of patients at high risk of diabetes-related complications<sup>12</sup>. This is a public health concern because the current total health expenditure in most sub-Saharan Africa countries remains far below the 15% recommended in the Abuja declaration and the rising cost of managing diabetes complications will further make the health system goals unattainable<sup>1,14</sup>. Thus, this study aimed to evaluate the current prevalence of glycaemic, hypertension, and LDL-C control among ambulant patients with type 2 diabetes mellitus in Botswana to provide future guidance. The study also assessed for factors associated with attainment of glycaemic, blood pressure and LDL-C therapeutic patients in these patients.

## **Methods**

### **Study design and participants**

We conducted a cross-sectional study of outpatients with established type 2 diabetes attending a specialised public diabetes clinic in Gaborone, Botswana between August 2017 and February 2018. The clinic has been operational since 2011 as a referral centre for health facilities in Gaborone and nearby towns. Patients were eligible to participate in the study if they were aged  $\geq 18$  years and had received care from the clinic for at least three months. Systematic random sampling was used to select ten patients from a list of about 80 patients who attended the clinic every day. We picked the first patient from the first eight people in the queue. Then every eighth individual was approached until the daily target of 10 patients was reached. Participants provided informed consent before enrolment. The study was granted the ethical approval by the Ministry of Health (HPDME: 13/18/1 VOL XI) and Princess Marina Hospital (PMH 5/79,317-1-2017) Institutional Review Boards.

## Data collection and procedures

Patient information was collected using an interviewer-administered questionnaire and through reviews of medical charts and electronic records. The information included: demography (age, gender, occupation, marital status, and education), diabetes duration, history of hypertension, and medications for diabetes, hypertension and lipid disorders. We performed anthropometry (weight, height, waist and hip circumferences) and blood pressure measurements at enrolment. We conducted three blood pressure measurements after 10 minutes of rest, and the mean of the three measurements was recorded<sup>15</sup>. Moreover, we documented a blood pressure reading from each patient's prior visit. Patients' serum creatinine, LDL-C and HbA1c, and urine dipstick for proteinuria results over the past six months were abstracted from electronic medical records.

## Definitions of the key outcomes and exposure variables

We calculated diabetes duration as the date of enrolment into the study minus the date of diabetes diagnosis. A patient was considered hypertensive by self-reported hypertension and the use of blood pressure-lowering medications or has sustained blood pressure  $\geq 140/90$  mmHg during the previous visit and at enrolment<sup>16-18</sup>. Optimal glycaemic control was defined as HbA1c  $< 7\%$ <sup>16 18</sup>. For patients who were on lipid-lowering medications, optimal LDL-C control was LDL cholesterol level  $< 1.8$  mmol/L<sup>16</sup>. We calculated patients' eGFR by the Modification of Diet in Renal Disease (MDRD) formula, and an eGFR  $< 60.0$  mL/min/1.73m<sup>2</sup> defined Chronic Kidney Disease (CKD)<sup>2 19 20</sup>. Body mass index (BMI) was calculated as weight in kilograms divided by the square of height in meters. We considered underweight as BMI  $< 18.5$  kg/m<sup>2</sup>, normal weight as BMI of 18.5 –24.9 kg/m<sup>2</sup>, overweight as BMI of 25.0 –29.9 kg/m<sup>2</sup>, and obesity as BMI  $\geq 30$  kg/m<sup>2</sup><sup>21</sup>. Waist-hip ratio (WHR) was calculated as waist circumference (WC) in centimetres divided by hip circumference (HC) in centimetres, and WHR  $\geq 0.85$  for women and  $\geq 0.90$  for men were classified as high<sup>21</sup>.

## Statistical analysis

Analyses were performed using Stata, Version 14 (Stata Corp, College Station, TX). We used percentages to summarise categorical variables. Means and standard deviation (SD) or medians and interquartile range (IQR) were used to summarise continuous variables. Pearson's  $\chi^2$  or Fisher's exact tests were used to assessing statistical differences by gender for the categorical variables, while the Student's t-test or the Mann-Whitney U test were used for the continuous ones. Bivariate logistic regression was used to explore factors associated with each primary outcome - glycaemic, hypertension and LDL-C control. We further performed three multivariate logistic regression models for each of the three outcomes. The independent variables selected for multivariate models were those displaying a p-value  $< 0.2$  at the univariate analysis level in addition to those considered clinically meaningful (age and gender). We described results as

1  
2  
3 crude odds ratio (OR), adjusted odds ratio (AOR), and their corresponding 95% confidence intervals  
4 (95% CI). A 2-tailed p-value < 0.05 was considered statistically significant.  
5

## 6 **Results**

7  
8 We included 500 patients with type 2 diabetes in the study, of which 330 (66%) were females. The mean  
9 (SD) age was 58.9 (12.2) years and 78.2% were aged > 50 years. The median (IQR) diabetes duration  
10 was 6 (2 – 13) years. There were a high percentage of patients with hypertension (80.8%), overweight  
11 (31.1%) and obesity (50.2%). Table 1 summarises the patients' characteristics by gender. Female patients  
12 tended to be older (60.8 vs 55.4 years, p<0.001, obese (56.7% vs 37.1%, p<0.001), have higher WHR  
13 (95.2% vs 55.9%), be hypertensive (86.1% vs 70.6%, p<0.001), and have a higher mean total cholesterol  
14 (4.5mmol/L vs 4.3mmol/L, p=0.030 and LDL-C (2.9mmol/L vs 2.6mmol/L, p=0.006) than male patients.  
15 Urine dipstick was positive for protein in 10.2% of patients, mostly males (15.9% vs 7.3%, P = 0.003).  
16  
17  
18  
19  
20  
21

22 **[Table 1: Clinical and socio-demographic characteristics of patients with type 2 diabetes at a**  
23 **specialised Diabetes clinic in Gaborone (N= 500)]**  
24  
25  
26

## 27 **Optimal glycaemic control**

28 The mean (SD) HbA1c was 8.4 (2.4) % overall, 8.6 (2.7) % for female and 8.0 (1.6) % for male patients  
29 (p=0.199) [Table 1]. The proportion of the patients receiving oral hypoglycaemic agents alone was  
30 54.2%; 30% were treated with oral hypoglycaemic agents combined with insulin; 13.6% insulin alone and  
31 2.2% were on a diet alone. Of all the 218 patients on insulin, 184 (84.4%) were on premix insulin. Of all  
32 the 421 patients on oral hypoglycaemic agents, 411(97.6%) patients were on metformin, and 194 (46.1%)  
33 patients were on a sulphonylurea. Compared to patients on other anti-diabetic medications, those on  
34 insulin injections were more likely to be males. We noted optimal glycaemic control in 159 (32.3%)  
35 patients, whose mean (SD) HbA1c was 6.1 (0.6) %. Age over 50 years was associated with optimal  
36 glycaemic control (AOR 5.79; 95%CI 1.08 – 31.14). On the other hand, an increase in diabetes duration  
37 was associated with lower odds of optimal glycaemic control (AOR 0.91; 95%CI 0.85 – 0.98). There was  
38 no association between gender, anthropometry, diabetes medications or education on the prevalence of  
39 optimal glycaemic control [Table 2].  
40  
41  
42  
43  
44  
45  
46  
47  
48

49 **[Table 2: Factors associated with optimal glycaemic control among patients with type 2 diabetes at**  
50 **a specialised diabetes clinic in Gaborone (N= 500)]**  
51  
52  
53  
54  
55  
56  
57

### Optimal hypertension control

There were 404 (80.8%) hypertensive patients [Table 1]. Age  $\geq$  50 years (AOR 4.954; 95%CI 2.811– 8.732), increased WHR (AOR 3.874; 95%CI 1.723–8.709), eGFR (AOR 0.982; 95% 0.975 – 0.989), and a long diabetes duration (AOR= 1.068, 95%CI: 1.019– 1.119) were associated with hypertension. Seventeen (4.2%) hypertensive patients did not receive any antihypertensive medication. Of the 389 patients who received antihypertensive medicines, 219 (56.3%) received calcium channel blockers, 189 (48.6%) were treated with thiazides diuretics, 183(47.0%) with angiotensin-converting enzyme inhibitors (ACE inhibitors), and 74(19.0%) with angiotensin receptor blockers (ARBs). The proportions of patients receiving  $\beta$ - and  $\alpha$ -blockers were 22.4% and 5.4% respectively.

Of the 389 patients who received antihypertensive medicines, optimal hypertension control was noted in 211 (54.2%) patients. Patients on ACE inhibitors had lower odds of optimal hypertension control, compared to those who were not treated by ACE inhibitors (AOR 0.35; 95% CI 0.14 – 0.85). There was no association between gender, anthropometry, or education on the prevalence of optimal hypertension control [Table 3].

**[Table 3: Factors associated with optimal hypertension control among patients with type 2 diabetes at a specialised diabetes clinic in Gaborone (N= 500)]**

### Optimal LDL-C control

A total of 225 (45%) patients were receiving lipid-lowering drugs, mostly (96.4%) atorvastatin. Of these, 147 (65.3%) patients had LDL-C measurements available. Only 30 (20.4%) achieved the optimal LDL-C control target. Females were less likely to achieve optimal LDL-C control as compared to males, (AOR 0.211; 95% CI 0.077 – 0.578). There was no association of age, anthropometry, or education on the prevalence of optimal LDL-C control [Table 4].

**[Table 4: Factors associated with optimal LDL-C control among patients with type 2 diabetes at a specialised diabetes clinic in Gaborone (N= 500)]**

### Discussion

This outpatient cross-sectional study showed a low proportion of patients with optimal control of glycaemic, hypertension, and LDL-C among Type 2 patients attending a diabetes clinic in Botswana. In the multivariate analysis, duration of diabetes and age above 50 years were significantly associated with the presence of an optimal glycaemic control. Being on ACEIs was inversely related to optimal



1  
2  
3 hypertension control compared to those who were not using ACEIs. Females were less likely to attain  
4 optimal LDL-C control than males.

5  
6 Only 32.3% of our participants achieved optimal glycaemic control. Similar findings have also been seen  
7 among patients with diabetes in Africa.<sup>10 12 22 23</sup>. The proportion of patients with optimal glycaemic  
8 control in specialised diabetes care centers across six sub-Saharan African countries was reported to be  
9 29%<sup>12</sup>, despite using a lower cut-off value of 6.5%. Similarly, only 7-20% of patients have been said to  
10 have attained optimal glycaemic control (HbA1c level < 7%) in South African diabetic clinics<sup>11 23</sup>.  
11 Suboptimal glycaemic is, therefore, a big concern not only in Botswana but also in other African  
12 countries. In most of the findings, the majority of the patients have HbA1c > 8%, well above the  
13 recommended target (<7%) required to avoid the development of microvascular and macrovascular  
14 complications<sup>11 12</sup>. This could explain the four and tenfold prevalence of sight-threatening diabetic  
15 retinopathy and proliferative retinopathy found in African populations compared to European prevalence  
16 is<sup>24</sup>. Despite this poor glycaemic control level, few of our patients were on insulin suggesting clinical  
17 inertia in response to low glycaemic control<sup>25</sup>. Similar to other studies in Sub-Saharan Africa, the  
18 likelihood of attaining optimal glycaemic control decreased as the duration of diabetes increased<sup>26</sup>. There  
19 is evidence of a progressive loss of beta-cell function with increasing diabetes duration<sup>6</sup>. Insulin  
20 production progressively declines over time, leading to sub-optimal glycaemic control unless higher  
21 dosages or additional agents are initiated<sup>6</sup>. Comparable to reports from other studies, our older patients  
22 were more likely to achieve optimal glycaemic control than young ones<sup>27 28</sup>. It is possible that young  
23 patients are less likely to be compliant with medication and lifestyle modification as compared to their  
24 older counterparts. However, we need to research this further before making any concrete statements  
25 and instigating pertinent quality improvement programmes.

26  
27 We also found a high prevalence (80.8%) of hypertension among patients attending our specialised  
28 diabetes clinic. A decade ago, the prevalence of hypertension among patients with diabetes in this setting  
29 was 61.2%<sup>29</sup>. Our findings may suggest an increasing burden of hypertension as seen globally, but also a  
30 reflection of the improvement in the screening and diagnosis of hypertension over the past few years<sup>30</sup>.  
31 We are aware that comparable high frequencies of hypertension have been reported in other African  
32 studies<sup>12</sup>. Consistent with previous studies, patients with hypertension were older, more obese, and had  
33 declining GFR and longer diabetes duration<sup>10 31</sup>. Thiazide diuretics; calcium channel blockers and ACE  
34 inhibitors were the three most used anti-hypertensive agents. This finding is in line with previous studies  
35 and guidelines recommendations suggesting that thiazide diuretics and calcium channels blockers are  
36 more effective than other anti-hypertensives in the black population<sup>16 17 31</sup>. Optimal hypertension control  
37 was observed in only 54.2% of the patients on anti-hypertensives, suggesting a need for efforts to improve  
38 identification and control of hypertension. This low rate is a concern given the increased mortality if

1  
2  
3 hypertension is not controlled<sup>5</sup>. Having said this, the proportion of patients with optimal hypertension  
4 control in our population was superior to several studies in Africa, notwithstanding, the variation of the  
5 definitions of optimal hypertension control across these studies<sup>10 12 13 31 32</sup>. In the present study, the use of  
6 ACE inhibitors was inversely associated with optimal hypertension control. Although ACEIs are  
7 indicated for patients with diabetes and proteinuria, they are associated with a clinically significant lesser  
8 reduction in both systolic and diastolic blood pressure in blacks. This could partly explain suboptimal  
9 hypertension control among our majority black patients. There appeared to be no influence of gender on  
10 hypertension control similar to other studies<sup>33</sup>, which is encouraging as a recent systematic review found  
11 that males in low and middle income countries (LMICs) were more likely to be non-adherent to their  
12 medications<sup>34 35</sup>.

13  
14  
15  
16  
17  
18  
19 Less than half of the patients (45%) were on lipid-lowering drugs, mostly statins. This is not surprising as  
20 the use of lipid-lowering drugs in Africa has been reported in as low as 3 – 13% of patients with diabetes  
21 due to the limited access to these drugs as well as lack of facilities for monitoring lipid profile while on  
22 treatment<sup>12 35 36</sup>. It is, however, a concern as the reduced use of statins will increase mortality rates in  
23 patients with diabetes<sup>7</sup>. In some countries, the issue of co-payments limits the prescription of expensive  
24 medications like statins<sup>37</sup>. Medicines are provided free of charge in Botswana; consequently, concerns  
25 with medication adherence due to co-payments should not be a problem<sup>37 38</sup>. Although the lack of co-  
26 payments has led to the more excellent use of statins in Botswana than in other African countries, we  
27 would expect the rate of statin prescriptions to mirror the high rates seen in Western countries<sup>39</sup>.  
28 Education and adherence to guidelines will possibly improve the prescription and use of statins by the  
29 majority of patients with diabetes according to treatment guidelines<sup>16 18</sup>. Even when statins were used, an  
30 undesirably small proportion of our patients achieved guideline-recommended LDL-C target level. Sub-  
31 optimal LDL-C control rates have also been reported across different settings, even in developed  
32 countries<sup>8 12 40 41</sup>. This is disappointing as achieving LDL-C reduction is said to be associated with the  
33 highest cardiovascular risk reduction than hypertension and HbA1c reduction<sup>8</sup>. Inadequate patients'  
34 adherence and possibly clinicians' under-dosage of statin for fear of potential side effects are some of the  
35 factors that possibly explain sub-optimal LDL-C control in our patients<sup>8</sup>. Besides, clinicians may be  
36 unaware of the current LDL-C as well as those of HbA1c and hypertension therapeutic goals<sup>16 18</sup>.  
37 Irrespective of the reason, there is an urgent need to instigate measures to meet guideline-recommended  
38 therapeutic, and we have started to address this in our clinics. As reported in other studies, women were  
39 less likely than men to achieve optimal LDL-C control<sup>40</sup>. Although the reason for this gender difference is  
40 not apparent, this information is significant for clinicians to pay attention to the management of women  
41 with diabetes in Botswana and other African countries.  
42  
43  
44  
45  
46  
47  
48  
49  
50  
51  
52  
53  
54  
55  
56  
57

### **Conclusion**

In conclusion, there was a high prevalence of suboptimal attainment of recommended glycaemic, hypertension and LDL-C targets for patients with diabetes in the study settings. These findings call for urgent individual and health systems interventions to address the factors associated with sub-optimal control of the cardiovascular risk factors among patients with type 2 diabetes. This will be the subject of future initiatives and research in our clinic given the growing prevalence of patients with type 2 diabetes in Botswana.

### **Funding**

This research received no specific grant from any funding agency in public, commercial or not-for-profit sectors.

### **Competing Interests statement**

Dr. Mwita has nothing to disclose.

Dr. Msafiri has nothing to disclose.

Dr. Omech has nothing to disclose.

Dr. Botsile has nothing to disclose.

Dr. Oyewo has nothing to disclose.

Dr. Godman has nothing to disclose.

Dr. Tshikuka has nothing to disclose.

### **Acknowledgments**

We sincerely thank the staff at the diabetes clinic for their assistance, and the participants for their time and patience to be part of the study.

### **Author contributions**

J.C.M was involved in the conception of the study, data analysis, drafting and revising the manuscript. B.O was involved in the conception of the study and critical revision of the manuscript. A.O, M.M participated in the conception of the study, data collection and critical revision of the manuscript. J.M.F participated in data analysis and manuscript review. E.B performed data entry and management, and critical revision of the manuscript. O.J.M, B.G, and J.G.T were involved in interpretation of the data and manuscript revision. All the authors granted a final approval of the version to be published; and agreed to be accountable for all aspects of the work in ensuring that questions related to the accuracy or integrity of any part of the work are appropriately investigated and resolved.

### **Data sharing statement**

The dataset analysed during the current study is available from the corresponding author on reasonable request, through the Princess Marina Hospital and Ministry of Health of Botswana ethical approval.

## References

1. International Diabetes Federation. IDF Diabetes Atlas, 8th edition. 2017. <http://www.diabetesatlas.org> (accessed July 24, 2018).
2. World Health Organization. Global report on diabetes. 2016. [http://apps.who.int/iris/bitstream/handle/10665/204871/9789241565257\\_eng.pdf;jsessionid=7534319F5DD126A2E538996187D64045?sequence=1](http://apps.who.int/iris/bitstream/handle/10665/204871/9789241565257_eng.pdf;jsessionid=7534319F5DD126A2E538996187D64045?sequence=1) (accessed August 2, 2018).
3. Low Wang CC, Hess CN, Hiatt WR, et al. Clinical Update: Cardiovascular Disease in Diabetes Mellitus: Atherosclerotic Cardiovascular Disease and Heart Failure in Type 2 Diabetes Mellitus - Mechanisms, Management, and Clinical Considerations. *Circulation* 2016;133(24):2459-502. doi: <https://doi.org/10.1161/CIRCULATIONAHA.116.022194> [published Online First: 2016/06/15]
4. Marks JB, Raskin P. Cardiovascular risk in diabetes: a brief review. *Journal of diabetes and its complications* 2000;14(2):108-15. doi: [https://doi.org/10.1016/S1056-8727\(00\)00065-9](https://doi.org/10.1016/S1056-8727(00)00065-9) [published Online First: 2000/08/26]
5. U.K Prospective Diabetes Study Group. Tight blood pressure control and risk of macrovascular and microvascular complications in type 2 diabetes: UKPDS 38. *BMJ (Clinical research ed)* 1998;317(7160):703-13. doi: <https://doi.org/10.1136/bmj.317.7160.703> [published Online First: 1998/09/11]
6. U.K. Prospective Diabetes Study Group. Overview of 6 years' therapy of type II diabetes: a progressive disease: UKPDS 16. *Diabetes* 1995;44(11):1249-58. doi: <https://doi.org/10.2337/diab.44.11.1249> [published Online First: 1995/11/01]
7. Collins R, Armitage J, Parish S, et al. MRC/BHF Heart Protection Study of cholesterol-lowering with simvastatin in 5963 people with diabetes: a randomised placebo-controlled trial. *Lancet (London, England)* 2003;361(9374):2005-16. doi: [https://doi.org/10.1016/S0140-6736\(03\)13636-7](https://doi.org/10.1016/S0140-6736(03)13636-7) [published Online First: 2003/06/20]
8. Wan EYF, Fung CSC, Yu EYT, et al. Effect of Multifactorial Treatment Targets and Relative Importance of Hemoglobin A1c, Blood Pressure, and Low-Density Lipoprotein-Cholesterol on Cardiovascular Diseases in Chinese Primary Care Patients With Type 2 Diabetes Mellitus: A Population-Based Retrospective Cohort Study. *Journal of the American Heart Association* 2017;6(8):e006400. doi: <https://doi.org/10.1161/JAHA.117.006400>
9. Saydah SH, Fradkin J, Cowie CC. Poor control of risk factors for vascular disease among adults with previously diagnosed diabetes. *JAMA* 2004;291(3):335-42. doi: <https://doi.org/10.1001/jama.291.3.335> [published Online First: 2004/01/22]
10. Mwita JC, Mugusi F, Lwakatare J, et al. Hypertension control and other cardiovascular risk factors among diabetic patients at Muhimbili National Hospital, Tanzania. *East African journal of public health* 2012;9(2):70-73.
11. Klisiewicz A, Raal F. Sub-optimal management of type 2 diabetes mellitus—a local audit. *Journal of Endocrinology, Metabolism and Diabetes of South Africa* 2009;14(1)
12. Sobngwi E, Ndour-Mbaye M, Boateng KA, et al. Type 2 diabetes control and complications in specialised diabetes care centres of six sub-Saharan African countries: the Diabcare Africa study. *Diabetes research and clinical practice* 2012;95(1):30-36. doi: <https://doi.org/10.1016/j.diabres.2011.10.018> [published Online First: 2011/11/11]
13. Kibirige D, Atuhe D, Sebunya R, et al. Suboptimal glycaemic and blood pressure control and screening for diabetic complications in adult ambulatory diabetic patients in

- Uganda: a retrospective study from a developing country. *Journal of Diabetes & Metabolic Disorders* 2014;13(1):40.
14. World Health Organization. The Abuja declaration: ten years on. 2011. 2016. [http://www.who.int/healthsystems/publications/abuja\\_report\\_aug\\_2011.pdf?ua=1](http://www.who.int/healthsystems/publications/abuja_report_aug_2011.pdf?ua=1) (accessed August 25, 2018).
  15. Chobanian AV, Bakris GL, Black HR, et al. The Seventh Report of the Joint National Committee on Prevention, Detection, Evaluation, and Treatment of High Blood Pressure: the JNC 7 report. *JAMA* 2003;289(19):2560-72. doi: <https://doi.org/10.1001/jama.289.19.2560> [published Online First: 2003/05/16]
  16. SEMDSA Type 2 Diabetes Guidelines Expert Committee. SEMDSA 2017 guidelines for the management of type 2 diabetes mellitus. *J Endocr Metab Diabetes S Afr* 2017;22(1 Suppl 1):S1-S196.
  17. James PA, Oparil S, Carter BL, et al. 2014 evidence-based guideline for the management of high blood pressure in adults: Report from the panel members appointed to the eighth joint national committee (JNC 8). *JAMA* 2014;311(5):507-20. doi: <https://doi.org/10.1001/jama.2013.284427> [published Online First: 2013/12/20]
  18. American Diabetes Association. Standards of Medical Care in Diabetes-2017 Abridged for Primary Care Providers. *Clinical diabetes : a publication of the American Diabetes Association* 2017;35(1):5-26. doi: <https://doi.org/10.2337/cd16-0067> [published Online First: 2017/02/02]
  19. Work Group and Evidence Review Team Membership. K/DOQI clinical practice guidelines for chronic kidney disease: evaluation, classification, and stratification. *American journal of kidney diseases : the official journal of the National Kidney Foundation* 2002;39(2 Suppl 1):S1-266. doi: [https://doi.org/10.1016/S0272-6386\(02\)70084-X](https://doi.org/10.1016/S0272-6386(02)70084-X) [published Online First: 2002/03/21]
  20. Levey AS, Greene T, Schluchter MD, et al. Glomerular filtration rate measurements in clinical trials. Modification of Diet in Renal Disease Study Group and the Diabetes Control and Complications Trial Research Group. *Journal of the American Society of Nephrology : JASN* 1993;4(5):1159-71. [published Online First: 1993/11/01]
  21. World Health Organization. Waist circumference and waist-hip ratio: report of a WHO expert consultation, Geneva, 8-11 December 2008. 2011. <http://www.who.int/iris/handle/10665/44583> (accessed 27/08/2018).
  22. Adeniyi OV, Yogeswaran P, Longo-Mbenza B, et al. Cross-sectional study of patients with type 2 diabetes in OR Tambo district, South Africa. *BMJ Open* 2016;6(7):e010875. doi: <http://dx.doi.org/10.1136/bmjopen-2015-010875> [published Online First: 2016/07/31]
  23. Erasmus RT, Blanco Blanco E, Okesina AB, et al. Assessment of glycaemic control in stable type 2 black South African diabetics attending a peri-urban clinic. *Postgrad Med J* 1999;75(888):603-6. doi: <http://dx.doi.org/10.1136/pgmj.75.888.603> [published Online First: 2000/01/06]
  24. Burgess PI, Allain TJ, García-Fiñana M, et al. High prevalence in Malawi of sight-threatening retinopathy and visual impairment caused by diabetes: identification of population-specific targets for intervention. *Diabetic Medicine* 2014;31(12):1643-50. doi: <http://dx.doi.org/10.1111/dme.12492>
  25. Shah BR, Hux JE, Laupacis A, et al. Clinical inertia in response to inadequate glycemic control: do specialists differ from primary care physicians? *Diabetes Care*

- 2005;28(3):600-6. doi: <http://dx.doi.org/10.2337/diacare.28.3.600> [published Online First: 2005/03/01]
26. Camara A, Balde NM, Sobngwi-Tambekou J, et al. Poor glycemic control in type 2 diabetes in the South of the Sahara: the issue of limited access to an HbA1c test. *Diabetes Res Clin Pract* 2015;108(1):187-92. doi: <https://doi.org/10.1016/j.diabres.2014.08.025> [published Online First: 2015/02/24]
27. El-Kebbi IM, Cook CB, Ziemer DC, et al. Association of younger age with poor glycemic control and obesity in urban African Americans with type 2 diabetes. *Arch Intern Med* 2003;163(1):69-75. doi: <https://doi.org/10.1001/archinte.163.1.69> [published Online First: 2003/01/14]
28. Fox KM, Gerber Pharmd RA, Bolinder B, et al. Prevalence of inadequate glycemic control among patients with type 2 diabetes in the United Kingdom general practice research database: A series of retrospective analyses of data from 1998 through 2002. *Clin Ther* 2006;28(3):388-95. doi: <https://doi.org/10.1016/j.clinthera.2006.03.005> [published Online First: 2006/06/06]
29. Mengesha AY. Hypertension and related risk factors in type 2 diabetes mellitus (DM) patients in Gaborone City Council (GCC) clinics, Gaborone, Botswana. *African health sciences* 2008;7(4)
30. Forouzanfar MH, Liu P, Roth GA, et al. Global Burden of Hypertension and Systolic Blood Pressure of at Least 110 to 115 mm Hg, 1990-2015. *JAMA* 2017;317(2):165-82. doi: <https://doi.org/10.1001/jama.2016.19043> [published Online First: 2017/01/18]
31. Choukem SP, Kengne AP, Dehayem YM, et al. Hypertension in people with diabetes in sub-Saharan Africa: revealing the hidden face of the iceberg. *Diabetes Res Clin Pract* 2007;77(2):293-9. doi: <http://dx.doi.org/10.1016/j.diabres.2006.11.007> [published Online First: 2006/12/23]
32. Adeniyi OV, Yogeswaran P, Longo-Mbenza B, et al. Uncontrolled Hypertension and Its Determinants in Patients with Concomitant Type 2 Diabetes Mellitus (T2DM) in Rural South Africa. *PLoS One* 2016;11(3):e0150033. doi: <http://dx.doi.org/10.1371/journal.pone.0150033> [published Online First: 2016/03/02]
33. Nashilongo MM, Singu B, Kalemeera F, et al. Assessing Adherence to Antihypertensive Therapy in Primary Health Care in Namibia: Findings and Implications. *Cardiovascular drugs and therapy* 2017;31(5-6):565-78. doi: <https://doi.org/10.1007/s10557-017-6756-8> [published Online First: 2017/10/17]
34. Nielsen JO, Shrestha AD, Neupane D, et al. Non-adherence to anti-hypertensive medication in low- and middle-income countries: a systematic review and meta-analysis of 92443 subjects. *Journal of human hypertension* 2017;31(1):14-21. doi: <https://doi.org/10.1038/jhh.2016.31> [published Online First: 2016/06/17]
35. Gudina EK, Amade ST, Tesfamichael FA, et al. Assessment of quality of care given to diabetic patients at Jimma University Specialised Hospital diabetes follow-up clinic, Jimma, Ethiopia. *BMC Endocr Disord* 2011;11:19. doi: <http://dx.doi.org/10.1186/1472-6823-11-19> [published Online First: 2011/12/22]
36. Uloko AE, Ofoegbu EN, Chinenye S, et al. Profile of Nigerians with diabetes mellitus - Diabcare Nigeria study group (2008): Results of a multicenter study. *Indian J Endocrinol Metab* 2012;16(4):558-64. doi: <http://dx.doi.org/10.4103/2230-8210.98011> [published Online First: 2012/07/28]

- 1  
2  
3 37. Simoens S, Sinnaeve PR. Patient co-payment and adherence to statins: a review and case  
4 studies. *Cardiovascular drugs and therapy* 2014;28(1):99-109. doi:  
5 <http://dx.doi.org/10.1007/s10557-013-6497-2> [published Online First: 2013/10/24]  
6  
7 38. Mathes T, Jaschinski T, Pieper D. Adherence influencing factors - a systematic review of  
8 systematic reviews. *Archives of public health = Archives belges de sante publique*  
9 2014;72(1):37. doi: <http://dx.doi.org/10.1186/2049-3258-72-37> [published Online First:  
10 2015/02/12]  
11 39. Pokharel Y, Akeroyd JM, Ramsey DJ, et al. Statin Use and Its Facility-Level Variation in  
12 Patients With Diabetes: Insight From the Veterans Affairs National Database. *Clinical*  
13 *cardiology* 2016;39(4):185-91. doi: <http://dx.doi.org/10.1002/clc.22503> [published  
14 Online First: 2016/04/10]  
15  
16 40. Pinchevsky Y, Shukla V, Butkow N, et al. The achievement of glycaemic, blood pressure  
17 and LDL cholesterol targets in patients with type 2 diabetes attending a South African  
18 tertiary hospital outpatient clinic. *Journal of Endocrinology, Metabolism and Diabetes*  
19 *of South Africa* 2015;20(2):81-86. doi:  
20 <http://dx.doi.org/10.1080/16089677.2015.1056468>  
21  
22 41. Pinchevsky Y, Butkow N, Chirwa T, et al. Glycaemic, blood pressure and cholesterol  
23 control in 25 629 diabetics. *Cardiovasc J Afr* 2015;26(4):188-92. doi:  
24 <http://dx.doi.org/10.5830/cvja-2015-050> [published Online First: 2015/09/26]  
25  
26  
27  
28  
29  
30  
31  
32  
33  
34  
35  
36  
37  
38  
39  
40  
41  
42  
43  
44  
45  
46  
47  
48  
49  
50  
51  
52  
53  
54  
55  
56  
57

**Table 1: Clinical and socio-demographic characteristics of patients with type 2 diabetes at a specialised Diabetes clinic in Gaborone (N= 500)**

| Characteristics                                | All (N=500)       | Males(n= 170 )     | Females(n= 330)    | P value          |
|------------------------------------------------|-------------------|--------------------|--------------------|------------------|
| Mean age (SD), years                           | 58.9 ± 12.2       | 55.4 ± 12.6        | 60.8 ± 11.6        | <0.001           |
| Age <50 years n (%)                            | 109(21.80)        | 57 (33.5)          | 52 (15.8)          | <0.001           |
| Age ≥ 50 years n (%)                           | 391 (78.20)       | 113 ( 66.5)        | 278(84.2)          |                  |
| Diabetes duration, median, IQR, years          | 6 (2 – 13)        | 6.5 (2 – 14)       | 6 ( 2.5 – 13)      | <b>0.927</b>     |
| HbA1c mean (SD), %                             | 8.4 (2.4)         | 8.6 ( 2.7)         | 8.4 (2.4)          | <b>0.199</b>     |
| Diabetes treatment                             |                   |                    |                    |                  |
| Diet alone n (%)                               | 11( 2.2)          | 3(1.8)             | 8 ( 2.4 )          | <b>0.001</b>     |
| Insulin alone n (%)                            | 68 (13.6)         | 38(22.3)           | 30 (9.1)           |                  |
| OHA alone n (%)                                | 271(54.2)         | 82(48.2)           | 189 (57.3)         |                  |
| Insulin and OHA                                | 150 (30.0)        | 47(27.7)           | 103(31.2)          |                  |
| BMI, mean (SD) kg/m <sup>2</sup>               | 30.5 ± 6.0        | 28.7 ± 5.2         | 31.4 ± 6.2         | <0.001           |
| Normal weight n (%)                            | 93 (18.7)         | 46(27.1)           | 49 (14.9)          | <0.001           |
| Overweight n (%)                               | 155(31.1)         | 61(36.3)           | 94 (28.5)          |                  |
| Obese n (%)                                    | 250(50.2)         | 63 (37.1)          | 187(56.7)          |                  |
| Marital status                                 |                   |                    |                    |                  |
| Living alone n (%)                             | 266 (53.20)       | 55 (32.4)          | 211(63.9)          | <0.001           |
| Living with a partner n (%)                    | 234( 46.8)        | 115 (67.6)         | 119(36.01)         |                  |
| Education status                               |                   |                    |                    |                  |
| No formal education, n (%)                     | 77(15.4)          | 26(15.3)           | 51 (15.5)          | <0.001           |
| Primary School, n (%)                          | 229(45.8)         | 56 (32.9)          | 173 (52.4)         |                  |
| Secondary school, n (%)                        | 131(26.2)         | 55(32.4)           | 76 (23.0)          |                  |
| College/University, n (%)                      | 63( 12.6)         | 33 (19.4)          | 30 (9.1)           |                  |
| WC, mean (SD), cm                              | 103.3 ±12.5       | 101.7 ± 11.9       | 104.0 ± 12.7       | <b>0.049</b>     |
| WHR                                            |                   |                    |                    |                  |
| Low WHR n (%)                                  | 75 (44.1)         | 16(4.9)            |                    | <b>&lt;0.001</b> |
| High WHR n (%)                                 | 95 (55.9)         | 314(95.2)          |                    |                  |
| CKD n (%)                                      | 54 (10.8)         | 24 (14.1)          | 30 (9.1)           | <b>0.086</b>     |
| eGFR, Median, IQR (ml/min/1.73m <sup>2</sup> ) | 112.5(84.3–138.1) | 113.1(80.8 –139.5) | 112.3(84.4 –137.9) | 0.737            |
| Total cholesterol mean (SD), mmol/L            | 4.4(1.1)          | 4.3(1.2)           | 4.5(1.1)           | <b>0.030</b>     |
| LDL-C mean (SD), mmol/L                        | 2.8(1.0)          | 2.6(1.0)           | 2.9(1.0)           | <b>0.006</b>     |
| Macroproteinuria n (%)                         | 51(10.20)         | 27 (15.9)          | 24(7.27)           | <b>0.003</b>     |
| Hypertension n (%)                             | 404 (80.80)       | 120 (70.59 )       | 284(86.06)         | <0.001           |
| Dyslipidaemia n (%)                            | 358 (71.60)       | 114 (67.06)        | 244(73.94 )        | 0.106            |

**Legend:** DM - Diabetes mellitus; WC- waist circumference; BMI- Body Mass Index; SD- standard deviation; IQR – interquartile range; eGFR- estimated glomerular filtration rate; LDL-C – Low-density lipoprotein; WHR – Waist-hip ratio, HbA1c- Haemoglobin A1c; CKD- Chronic kidney disease; OHA – oral hypoglycaemic agent



**Table 2: Factors associated with optimal glycaemic control among patients with type 2 diabetes at a specialised diabetes clinic in Gaborone (N= 500)**

| Characteristic                     | Unadjusted OR(95% CI) | P value          | Adjusted OR (95%CI) | P value      |
|------------------------------------|-----------------------|------------------|---------------------|--------------|
| Age group                          |                       |                  |                     |              |
| > 50 years                         | 1                     |                  | 1                   |              |
| ≤ 50 years                         | 2.16(1.29 – 3.61)     | <b>0.003</b>     | 5.79 (1.08 – 31.14) | <b>0.041</b> |
| Diabetes duration, years           | 0.97(0.95 – 0.99)     | <b>0.040</b>     | 0.909 (0.85 – 0.98) | <b>0.011</b> |
| Diabetes treatment                 |                       |                  |                     |              |
| Insulin alone(yes)                 | 0.80(0.45– 1.43)      | 0.450            |                     |              |
| OHA alone(yes)                     | 2.785 (1.862 – 4.167) | <b>&lt;0.001</b> | 0.90 (0.46 – 1.74)  | 0.745        |
| Insulin and OHA(yes)               | 0.185 (0.124 – 0.356) | <b>&lt;0.001</b> | 0.34 (0.07 – 1.70)  | 0.188        |
| BMI                                | 0.99(0.96 – 1.02)     | 0.427            |                     |              |
| Normal weight                      | 1                     |                  |                     |              |
| Overweight                         | 1.10 (0.64– 1.90)     | 0.721            |                     |              |
| Obese                              | 0.83(0.50 – 1.39)     | 0.476            |                     |              |
| Gender                             |                       |                  |                     |              |
| Men                                | 1                     |                  |                     |              |
| Women                              | 0.92(0.62 – 1.36)     | 0.663            | 0.42 (0.14 – 1.25)  | 0.120        |
| Education status                   |                       |                  |                     |              |
| None                               | 1                     | 1                |                     |              |
| Primary School                     | 1.58(0.88 – 2.81)     | 0.124            |                     |              |
| Secondary school                   | 1.14 (0.60 – 2.16)    | 0.687            |                     |              |
| College/University                 | 1.00( 0.47 – 2.13)    | 0.996            |                     |              |
| Marital status                     |                       |                  |                     |              |
| Living alone                       | 1                     |                  |                     |              |
| Living with a partner              | 0.93 (0.64 – 1.36)    | 0.703            |                     |              |
| WHR                                | 0.92 (0.13 – 6.58)    | 0.937            |                     |              |
| Low WHR                            | 1                     |                  |                     |              |
| High WHR                           | 0.92(0.57 – 1.50)     | 0.745            |                     |              |
| Weight, kg                         | 0.99 (0.98 – 1.01)    | 0.298            |                     |              |
| eGFR, (ml/min/1.73m <sup>2</sup> ) | 1.00 (0.99 – 1.00)    | 0.074            | 1.00(0.99 – 1.01)   | 0.766        |
| CKD (yes)                          | 1.053 (0.578 – 1.920) | 0.866            |                     |              |
| Macroproteinuria(yes)              | 1.16(0.63 – 2.14)     | 0.624            |                     |              |
| Optimal hypertension control(yes)  | 2.53 (1.63 – 3.93)    | <b>&lt;0.001</b> | 1.61(0.63 – 4.13)   | 0.322        |
| Optimal LDL-C control(yes)         | 2.10 ( 0.90 – 4.88)   | 0.086            | 2.20 (0.64 – 7.57)  | 0.209        |

**Legend:** Legend: BMI- Body Mass Index; CKD- Chronic kidney disease; DM - Diabetes mellitus; eGFR- estimated glomerular filtration rate; IQR – interquartile range; LDL-C – Low-density lipoprotein; OHA – oral hypoglycaemic agent; SD- standard deviation; WHR – Waist-hip ratio.

**Table 3: Factors associated with optimal hypertension control among patients with type 2 diabetes at a specialised diabetes clinic in Gaborone (N= 500)**

| Characteristic                     | Unadjusted OR (95% CI)  | P value          | Adjusted OR (95% CI)           | P value      |
|------------------------------------|-------------------------|------------------|--------------------------------|--------------|
| Age group                          |                         |                  |                                |              |
| < 50 years                         | 1                       |                  |                                |              |
| ≥50 years                          | 0.885(0.483 – 1.619)    | 0.691            |                                |              |
| Diabetes duration, years           | 0.972 (0.947 – 0.997)   | <b>0.023</b>     | 0.975 (0.923 – 1.029 )         | 0.352        |
| Diabetes treatment                 |                         |                  |                                |              |
| Insulin alone(yes)                 | 0.446 (0.243 – 0.819)   | <b>0.009</b>     | 1.150 (0.304 – 4.435)          | 0.837        |
| OHA alone(yes)                     | 1.940 (1.295 – 2.908)   | <b>0.001</b>     | 1.370 (0.512 – 3.661)          | 0.531        |
| Insulin and OHA(yes)               | 0.588 (0.403 – 0.949)   | <b>0.028</b>     | 1.15(0.304 – 4.374)            | 0.837        |
| BMI, kg/m <sup>2</sup>             |                         |                  |                                |              |
| Normal weight                      | 1                       |                  |                                |              |
| Overweight                         | 0.786 (0.422 – 1.465)   | 0.449            |                                |              |
| Obese                              | 0.774(0.435 – 1.378)    | 0.384            |                                |              |
| Gender                             |                         |                  |                                |              |
| Men                                | 1                       |                  |                                |              |
| Women                              | 1.425(0.915 – 2.219)    | 0.117            | 0.968 (0.359 – 2.608 )         | 0.949        |
| Marital                            |                         |                  |                                |              |
| Living alone                       | 1                       |                  |                                |              |
| Living with partner                | 0.675 (0.614 –1.371)    | 0.668            |                                |              |
| Education status                   |                         |                  |                                |              |
| No formal education                | 1                       |                  |                                |              |
| Primary School                     | 1.028(0.578 – 1.827)    | 0.09             |                                |              |
| Secondary school                   | 1.078(0.556 – 2.091)    | 0.22             |                                |              |
| College/University                 | 0.887(0.410 – 1.919)    | 0.761            |                                |              |
| WHR                                | 1.293 (0.139 – 11.997)  | 0.821            |                                |              |
| Low WHR                            | 1                       |                  |                                |              |
| High WHR                           | 1.177 (0.653 – 2.121)   | 0.589            |                                |              |
| eGFR, (ml/min/1.73m <sup>2</sup> ) | 1.004 (0.999 – 0 1.009) | 0.139            | 1.004(0.994 – 1.015)           | 0.412        |
| Serum Cholesterol                  | 0.964 (0.804 – 1.156)   | 0.693            |                                |              |
| Macroproteinuria                   | 0.484(0.255 –0.921)     | <b>0.027</b>     | 0.360(0.072 1.800) .<br>.35961 | 0.213        |
| Antihypertensive                   |                         |                  |                                |              |
| CCB(yes)                           | 0.729(0.718 – 1.607)    | 0.729            |                                |              |
| Thiazides(yes)                     | 1.583(1.058 – 2.369)    | <b>0.026</b>     | 1.444 (0.615 – 3.391)          | 0.399        |
| ACEI(yes)                          | 0.636 (0.425 – 0.952)   | <b>0.028</b>     | 0.348 (0.142 – 0.849)          | <b>0.020</b> |
| ARB(yes)                           | 0.947(0.568 – 1.578)    | 0.834            |                                |              |
| Alpha blocker(yes)                 | 0.243(0.087 – 0.677)    | <b>0.007</b>     | 0.756 (0.136 –4.195)           | 0.749        |
| Beta blocker(yes)                  | 0.702 (0.434 –1.135)    | 0.149            | 0.514(0.193 – 1.374)           | 0.184        |
| Optimal Glycaemic control(yes)     | 2.531 (1.631 – 3.928)   | <b>&lt;0.001</b> | 1.921 (0.706 –5.228)           | 0.201        |
| Optimal LDL-C control(yes)         | 0.554 (0.225 – 1.363)   | 0.199            | 0.754 (0.245 – 2.320)          | 0.623        |

**Legend:** ACEI – Angiotensin-converting enzyme inhibitors; ARB – Angiotensin Receptor Blockers; BMI- Body Mass Index; CCB- Calcium Channel Blockers; DM - Diabetes mellitus; eGFR- estimated glomerular filtration rate; HbA1c- Haemoglobin A1c; IQR – interquartile range; LDL-C – Low-density lipoprotein; OHA – oral hypoglycaemic agent; SD- standard deviation; WHR – Waist-hip ratio.

**Table 4: Factors associated with optimal LDL-C control among patients with type 2 diabetes at a specialised diabetes clinic in Gaborone (N= 500)**

| Characteristic                     | Unadjusted OR (95% CI) | P value          | Adjusted OR (95% CI)  | P value |
|------------------------------------|------------------------|------------------|-----------------------|---------|
| Age group                          |                        |                  |                       |         |
| <50 years                          | 1                      |                  |                       |         |
| ≥ 50 years                         | 0.559 (0.208 – 1.503)  | 0.249            |                       |         |
| Diabetes duration, years           | 1.016(0.968 – 1.064)   | 0.525            |                       |         |
| Diabetes treatment                 |                        |                  |                       |         |
| Insulin alone(yes)                 | 1.578 (0.559 – 4.458)  | 0.389            |                       |         |
| OHA alone(yes)                     | 0.95 (0.426 – 2.119)   | 0.9              |                       |         |
| Insulin and OHA(yes)               | 0.825 (0.345 – 1.968)  | 0.664            |                       |         |
| BMI                                | 0.998 (0.933 –1.068)   | 0.951            |                       |         |
| Normal weight                      | 1                      |                  |                       |         |
| Overweight                         | 1.429 (0.344 – 5.940)  | 0.624            |                       |         |
| Obese                              | 1.269(0.329 – 4.889)   | 0.730            |                       |         |
| Gender                             |                        |                  |                       |         |
| Men                                | 1                      |                  |                       |         |
| Women                              | 0.2 (0.086 – 0.467)    | <b>&lt;0.001</b> | 0.211 (0.077 – 0.578) | 0.002   |
| Education status                   |                        |                  |                       |         |
| No formal education                | 1                      | 1                |                       |         |
| Primary School                     | 0.793 (0.294 – 2.140)  | 0.647            |                       |         |
| Secondary school                   | 0.284 (0.068 – 1.198)  | 0.087            |                       |         |
| College/University                 | 0.786( 0.199 – 3.106)  | 0.731            |                       |         |
| Marital status                     |                        |                  |                       |         |
| Living alone                       | 1                      |                  |                       |         |
| Living with a partner              | .986 (0.441– 2.204)    | 0.973            |                       |         |
| HbA1c                              | 1.001(0.850 – 0.198)   | 0.917            |                       |         |
| Low WHR                            | 1                      |                  |                       |         |
| High WHR                           | 0.307(0.105 – 0.891)   | <b>0.030</b>     | 1.699(0.361 – 7.982)  | 0.502   |
| Macroproteinuria                   | 0.688 ( 0.144 – 3.286) | 0.64             |                       |         |
| eGFR, (ml/min/1.73m <sup>2</sup> ) | 0.999(0.991 – 1.008)   | 0.878            |                       |         |
| CKD (yes)                          | 1.8756(0.727 – 4.833)  | 0.193            |                       |         |
| Hypertension (yes)                 | 1.125 (0.299 – 4.232)  | 0.862            |                       |         |
|                                    |                        |                  |                       |         |
|                                    |                        |                  |                       |         |

**Legend:** Legend: BMI- Body Mass Index; CKD- Chronic kidney disease; DM - Diabetes mellitus; eGFR- estimated glomerular filtration rate; IQR – interquartile range; LDL-C – Low-density lipoprotein; OHA – oral hypoglycaemic agent; SD- standard deviation; WHR–Waist-hip ratio

**STROBE 2007 (v4) Statement—Checklist of items that should be included in reports of *cross-sectional studies***

| Section/Topic                | Item # | Recommendation                                                                                                                                                                       | Reported on page # |
|------------------------------|--------|--------------------------------------------------------------------------------------------------------------------------------------------------------------------------------------|--------------------|
| <b>Title and abstract</b>    | 1      | (a) Indicate the study's design with a commonly used term in the title or the abstract                                                                                               | 1                  |
|                              |        | (b) Provide in the abstract an informative and balanced summary of what was done and what was found                                                                                  | 1                  |
| <b>Introduction</b>          |        |                                                                                                                                                                                      |                    |
| Background/rationale         | 2      | Explain the scientific background and rationale for the investigation being reported                                                                                                 | 2                  |
| Objectives                   | 3      | State specific objectives, including any prespecified hypotheses                                                                                                                     | 2                  |
| <b>Methods</b>               |        |                                                                                                                                                                                      |                    |
| Study design                 | 4      | Present key elements of study design early in the paper                                                                                                                              | 2                  |
| Setting                      | 5      | Describe the setting, locations, and relevant dates, including periods of recruitment, exposure, follow-up, and data collection                                                      | 2                  |
| Participants                 | 6      | (a) Give the eligibility criteria, and the sources and methods of selection of participants                                                                                          | 2                  |
| Variables                    | 7      | Clearly define all outcomes, exposures, predictors, potential confounders, and effect modifiers. Give diagnostic criteria, if applicable                                             | 2                  |
| Data sources/<br>measurement | 8*     | For each variable of interest, give sources of data and details of methods of assessment (measurement). Describe comparability of assessment methods if there is more than one group | 2                  |
| Bias                         | 9      | Describe any efforts to address potential sources of bias                                                                                                                            | 2                  |
| Study size                   | 10     | Explain how the study size was arrived at                                                                                                                                            | 2                  |
| Quantitative variables       | 11     | Explain how quantitative variables were handled in the analyses. If applicable, describe which groupings were chosen and why                                                         | 3                  |
| Statistical methods          | 12     | (a) Describe all statistical methods, including those used to control for confounding                                                                                                | 3                  |
|                              |        | (b) Describe any methods used to examine subgroups and interactions                                                                                                                  | 3                  |
|                              |        | (c) Explain how missing data were addressed                                                                                                                                          |                    |
|                              |        | (d) If applicable, describe analytical methods taking account of sampling strategy                                                                                                   |                    |
|                              |        | (e) Describe any sensitivity analyses                                                                                                                                                |                    |
| <b>Results</b>               |        |                                                                                                                                                                                      | 3                  |

|                          |     |                                                                                                                                                                                                                                                                                                                                                                                                               |     |
|--------------------------|-----|---------------------------------------------------------------------------------------------------------------------------------------------------------------------------------------------------------------------------------------------------------------------------------------------------------------------------------------------------------------------------------------------------------------|-----|
| Participants             | 13* | (a) Report numbers of individuals at each stage of study—eg numbers potentially eligible, examined for eligibility, confirmed eligible, included in the study, completing follow-up, and analysed<br>(b) Give reasons for non-participation at each stage<br>(c) Consider use of a flow diagram                                                                                                               | 3   |
| Descriptive data         | 14* | (a) Give characteristics of study participants (eg demographic, clinical, social) and information on exposures and potential confounders<br>(b) Indicate number of participants with missing data for each variable of interest                                                                                                                                                                               | 4   |
| Outcome data             | 15* | Report numbers of outcome events or summary measures                                                                                                                                                                                                                                                                                                                                                          | 4,5 |
| Main results             | 16  | (a) Give unadjusted estimates and, if applicable, confounder-adjusted estimates and their precision (eg, 95% confidence interval). Make clear which confounders were adjusted for and why they were included<br>(b) Report category boundaries when continuous variables were categorized<br>(c) If relevant, consider translating estimates of relative risk into absolute risk for a meaningful time period | 4,5 |
| Other analyses           | 17  | Report other analyses done—eg analyses of subgroups and interactions, and sensitivity analyses                                                                                                                                                                                                                                                                                                                |     |
| <b>Discussion</b>        |     |                                                                                                                                                                                                                                                                                                                                                                                                               |     |
| Key results              | 18  | Summarise key results with reference to study objectives                                                                                                                                                                                                                                                                                                                                                      | 5   |
| Limitations              | 19  | Discuss limitations of the study, taking into account sources of potential bias or imprecision. Discuss both direction and magnitude of any potential bias                                                                                                                                                                                                                                                    | 1   |
| Interpretation           | 20  | Give a cautious overall interpretation of results considering objectives, limitations, multiplicity of analyses, results from similar studies, and other relevant evidence                                                                                                                                                                                                                                    | 8   |
| Generalisability         | 21  | Discuss the generalisability (external validity) of the study results                                                                                                                                                                                                                                                                                                                                         | 8   |
| <b>Other information</b> |     |                                                                                                                                                                                                                                                                                                                                                                                                               |     |
| Funding                  | 22  | Give the source of funding and the role of the funders for the present study and, if applicable, for the original study on which the present article is based                                                                                                                                                                                                                                                 | 8   |

\*Give information separately for cases and controls in case-control studies and, if applicable, for exposed and unexposed groups in cohort and cross-sectional studies.

**Note:** An Explanation and Elaboration article discusses each checklist item and gives methodological background and published examples of transparent reporting. The STROBE checklist is best used in conjunction with this article (freely available on the Web sites of PLoS Medicine at <http://www.plosmedicine.org/>, Annals of Internal Medicine at <http://www.annals.org/>, and Epidemiology at <http://www.epidem.com/>). Information on the STROBE Initiative is available at [www.strobe-statement.org](http://www.strobe-statement.org).

# BMJ Open

## Glycaemic, blood pressure and low-density lipoprotein-cholesterol control among patients with diabetes mellitus in a specialised clinic in Botswana: a cross-sectional study

|                                 |                                                                                                                                                                                                                                                                                                                                                                                                                                                                                                                                                                                                                                                                                                                                                                                                                                                                                                                                                                                                                                                                                                                                  |
|---------------------------------|----------------------------------------------------------------------------------------------------------------------------------------------------------------------------------------------------------------------------------------------------------------------------------------------------------------------------------------------------------------------------------------------------------------------------------------------------------------------------------------------------------------------------------------------------------------------------------------------------------------------------------------------------------------------------------------------------------------------------------------------------------------------------------------------------------------------------------------------------------------------------------------------------------------------------------------------------------------------------------------------------------------------------------------------------------------------------------------------------------------------------------|
| Journal:                        | <i>BMJ Open</i>                                                                                                                                                                                                                                                                                                                                                                                                                                                                                                                                                                                                                                                                                                                                                                                                                                                                                                                                                                                                                                                                                                                  |
| Manuscript ID                   | bmjopen-2018-026807.R1                                                                                                                                                                                                                                                                                                                                                                                                                                                                                                                                                                                                                                                                                                                                                                                                                                                                                                                                                                                                                                                                                                           |
| Article Type:                   | Research                                                                                                                                                                                                                                                                                                                                                                                                                                                                                                                                                                                                                                                                                                                                                                                                                                                                                                                                                                                                                                                                                                                         |
| Date Submitted by the Author:   | 24-Mar-2019                                                                                                                                                                                                                                                                                                                                                                                                                                                                                                                                                                                                                                                                                                                                                                                                                                                                                                                                                                                                                                                                                                                      |
| Complete List of Authors:       | Mwita, Julius; University of Botswana, Internal medicine; Princess Marina Hospital, Internal Medicine<br>Francis, Joel; Wits Health Consortium Pty Ltd, Wits Reproductive Health & HIV Institute; Harvard University T H Chan School of Public Health, Global Health<br>Omech, Bernard; University of Botswana, Internal Medicine; Princess Marina Hospital, Internal Medicine<br>Botsile, Elizabeth; University of Botswana, Internal Medicine; Princess Marina Hospital, Internal Medicine<br>Oyewo, Aderonke ; Princess Marina Hospital, Internal Medicine<br>Mokgwathi, Matshidiso ; University of Botswana, Internal medicine; Princess Marina Hospital, Internal Medicine<br>Molefe-Baikai , Onkabetse ; University of Botswana, Internal medicine; Princess Marina Hospital, Internal Medicine<br>Godman, Brian; University of Liverpool, Health Economics; Karolinska Universitetssjukhuset, Laboratory Medicine, Division of Clinical Pharmacology<br>Tshikuka, Jose- Gaby; University of Botswana, Family Medicine and Public Health, Faculty of Medicine; National Pedagogical University, Faculty of Health Sciences |
| <b>Primary Subject Heading</b>: | Diabetes and endocrinology                                                                                                                                                                                                                                                                                                                                                                                                                                                                                                                                                                                                                                                                                                                                                                                                                                                                                                                                                                                                                                                                                                       |
| Secondary Subject Heading:      | Cardiovascular medicine                                                                                                                                                                                                                                                                                                                                                                                                                                                                                                                                                                                                                                                                                                                                                                                                                                                                                                                                                                                                                                                                                                          |
| Keywords:                       | Glycemic, Botswana, LDL, Hypertension < CARDIOLOGY, Diabetes Mellitus, control                                                                                                                                                                                                                                                                                                                                                                                                                                                                                                                                                                                                                                                                                                                                                                                                                                                                                                                                                                                                                                                   |
|                                 |                                                                                                                                                                                                                                                                                                                                                                                                                                                                                                                                                                                                                                                                                                                                                                                                                                                                                                                                                                                                                                                                                                                                  |

SCHOLARONE™  
Manuscripts

1  
2  
3 **Glycaemic, blood pressure and low-density lipoprotein-cholesterol control among patients with**  
4 **diabetes mellitus in a specialised clinic in Botswana: a cross-sectional study**  
5

6 Julius Chacha Mwita<sup>1,2\*</sup>, Joel Msafiri Francis<sup>3,4</sup>, Bernard Omech<sup>1,2</sup>, Elizabeth Botsile<sup>2</sup>, Aderonke Oyewo<sup>2</sup>,  
7 Matshidiso Mokgwathi<sup>1,2</sup>, Onkabetse Julia Molefe-Baikai<sup>1,2</sup>, Brian Godman<sup>5,6</sup>, Jose Gaby Tshikuka<sup>7,8</sup>  
8

9 **Authors' affiliations**

10 <sup>1</sup>Department of Internal Medicine, Faculty of Medicine, University of Botswana, Gaborone,  
11 Botswana

12 <sup>2</sup>Department of internal Medicine, Princess Marina Hospital, Gaborone, Botswana

13 <sup>3</sup>Wits Health Consortium, Wits Reproductive Health & HIV Institute, Johannesburg, South  
14 Africa

15 <sup>4</sup> Department of Global Health, Harvard University T H Chan School of Public Health,  
16 Boston, MA, USA

17 <sup>5</sup>Department of Laboratory Medicine, Division of Clinical Pharmacology, Karolinska Institutet,  
18 Karolinska University Hospital Huddinge, Stockholm, Sweden

19 <sup>6</sup> Liverpool Health Economics, University of Liverpool, Liverpool, UK

20 <sup>7</sup>Department of Family Medicine and Public Health, Faculty of Medicine, University of  
21 Botswana, Gaborone, Botswana

22 <sup>8</sup>Faculty of Health Sciences, National Pedagogic, University, Kinshasa, the Democratic Republic  
23 of the Congo  
24  
25  
26  
27  
28

29 **Correspondence to**

30 **Dr Julius Chacha Mwita;**

31 The University of Botswana, Faculty of Medicine,

32 Private Bag 00713, Gaborone, Botswana

33 Phone: +26773078658

34 Email: [mwitajc@ub.ac.bw](mailto:mwitajc@ub.ac.bw)  
35  
36  
37  
38  
39  
40  
41  
42  
43  
44  
45  
46  
47  
48  
49  
50  
51  
52  
53  
54  
55  
56  
57  
58  
59  
60

## **Abstract**

**Objective:** Control of glycaemic, hypertension and low-density lipoprotein-cholesterol (LDL-C) among type 2 diabetes mellitus (T2DM) patients is vital for the prevention of cardiovascular diseases (CVD). The current study was an audit of glycaemic, hypertension, and LDL-C control among ambulant patients with type 2 diabetes mellitus in Botswana. Also, the study aimed at assessing factors associated with attaining optimal glycaemic, hypertension and LDL-C therapeutic goals.

**Design:** A cross-sectional study.

**Setting:** A specialised public diabetes clinic in Gaborone, Botswana.

**Participants:** Type 2 diabetes mellitus patients who had attended the clinic for  $\geq$  three months between August 2017 and February 2018.

**Primary outcome measure:** The proportion of patients with optimal glycaemic (HbA1c  $<7\%$ ), hypertension (blood pressure  $<140/90$ mmHg) and LDL-C ( $<1.8$ mmol/L) control.

**Results:** The proportions of patients meeting optimal targets were 32.3% for glycaemic, 54.2% for hypertension, and 20.4% for LDL-C. Optimal glycaemic control was positively associated with age  $\geq 50$  years (AOR 5.79; 95% CI 1.08 - 31.14) but was inversely associated with an increase in diabetes duration (AOR 0.91; 95%CI 0.85 - 0.98). Being on an angiotensin-converting-enzyme inhibitor (ACE inhibitor) was inversely associated with optimal hypertension control (AOR 0.35; 95% CI 0.14 - 0.85). Being female (AOR 0.24; 95% CI (0.09 - 0.59) was inversely associated with optimal LDL-C control.

**Conclusion:** Patients with Type 2 diabetes mellitus in Gaborone, Botswana, presented with suboptimal control of recommended glycaemic, hypertension and LDL-C targets. These findings call for urgent individual and health systems interventions to address key determinants of the recommended therapeutic targets among patients with diabetes in this setting.

**Keywords:** Glycaemic, hypertension, LDL-C, cholesterol, control Diabetes Mellitus, Botswana



**Strengths and limitations of this study**

- The first study to objectively assess the three critical therapeutic targets in patients with diabetes in Botswana.
- The study was done in one specialised public diabetes clinic and may not be generalised to other facilities in the country. The clinic is, however, a leading diabetes care facility in the country; hence the results may predict the status in other facilities.
- The cross-sectional design limited the assessment of the temporal relationship between factors associated with poor control of glycaemia, LDL-C and hypertension.
- Systematic random sampling and incomplete data in some participants may not have yielded a representative sample of our clinic enrollees.

## **Introduction**

Diabetes mellitus and related cardiovascular complications are growing public health concerns worldwide<sup>1,2</sup>. There are approximately 16 million people with diabetes in Africa, and this number is projected to increase to 41 million by 2045 due to rapid urbanisation, lifestyles changes and nutrition transition in the continent<sup>1</sup>. This increase in prevalence and incidence of diabetes is attributable to type 2 diabetes, which is associated with multiple comorbidities such as obesity and hypertension requiring chronic care and catastrophic health expenditure<sup>1</sup>. Diabetes and associated comorbidities are known to increase patients' risk of developing cardiovascular diseases (CVD), which are responsible for approximately 70% of diabetes-related deaths<sup>3</sup>. The risk to the development of CVD is higher in people with suboptimal glycaemic, hypertension and LDL-C control<sup>3,4</sup>. A reduction of HbA1c to control targets along with optimal hypertension control and the use of statins to lower LDL-C levels have been shown to improve long-term outcomes including reducing mortality among patients with diabetes<sup>5-8</sup>. Achieving these targets remains a challenge in most settings, especially those with limited access to standard diabetes care<sup>9-13</sup>. Only a minority of patients with diabetes in Africa achieves optimal therapeutic targets, leaving the majority of patients at high risk of diabetes-related complications<sup>12</sup>. Suboptimal treatment to recommended targets is a public health concern because the current total health expenditure in most sub-Saharan African countries remains far below the 15% recommended in the Abuja declaration<sup>14</sup>. The rising cost of managing diabetes complications will further make health system goals unattainable<sup>1</sup>. Thus, this study was an audit of glycaemic, hypertension, and LDL-C control among ambulant patients with type 2 diabetes mellitus in Botswana. The study also assessed factors associated with attainment of glycaemic, blood pressure and LDL-C therapeutic targets in these patients.

## **Methods**

### **Study design and participants**

We conducted a cross-sectional study of outpatients with established type 2 diabetes attending a specialised public diabetes clinic in Gaborone, Botswana between August 2017 and February 2018. The clinic has been operational since 2011 as a referral centre for health facilities in Gaborone and nearby towns. Eligible patients were those aged  $\geq 18$  years and had received care from the clinic for at least three months. Systematic random sampling was used to select patients from a list of patients who attended the clinic every day. We randomly picked the first patient from the first eight people in the queue. Subsequently, every eighth individual was enrolled until either the daily target of 10 patients was reached or the clinic came to an end. As there was a daily variation of the number of clinic attendees, the number of our daily enrolments varied as well. Participants provided informed consent before enrolment. The Ministry of Health (HPDME: 13/18/1 VOL XI) and Princess Marina Hospital (PMH 5/79,317-1-2017) Institutional Review Boards granted ethical approval for the study.

## Data collection and procedures

Patient information was collected using an interviewer-administered questionnaire and through reviews of medical charts and electronic records. The information included: demographic data (age, gender, occupation, marital status, and education), diabetes duration, history of hypertension, and medications for diabetes, hypertension and lipid disorders. We performed anthropometry (weight, height, waist and hip circumferences) and blood pressure measurements at enrolment. We conducted three blood pressure measurements after 10 minutes of rest, and the mean of the three measurements was recorded<sup>15</sup>. Moreover, we documented blood pressure readings from each patient's prior visit. Patients' serum creatinine, LDL-C and HbA1c, and urine dipstick for proteinuria results over the past six months were abstracted from the electronic medical records.

## Definitions of the key outcomes and exposure variables

We calculated the diabetes duration as the date of enrolment into the study minus the date of diabetes diagnosis. A patient was considered hypertensive by self-reported hypertension and the use of blood pressure-lowering medications or had sustained blood pressure  $\geq 140/90$  mmHg during the previous visit and at enrolment<sup>16-18</sup>. Optimal glycaemic control was defined as HbA1c  $< 7\%$ <sup>16 18</sup>. For patients who were on lipid-lowering medications, optimal LDL-C control was LDL cholesterol level  $< 1.8$  mmol/L<sup>16</sup>. We calculated patients' eGFR by the Modification of Diet in Renal Disease (MDRD) formula, and an eGFR  $< 60.0$  mL/min/1.73m<sup>2</sup> defined Chronic Kidney Disease (CKD)<sup>2 19 20</sup>. Body mass index (BMI) was calculated as weight in kilograms divided by the square of height in meters. We considered underweight as BMI  $< 18.5$  kg/m<sup>2</sup>, normal weight as BMI of 18.5 –24.9 kg/m<sup>2</sup>, overweight as BMI of 25.0 –29.9 kg/m<sup>2</sup>, and obesity as BMI  $\geq 30$  kg/m<sup>2</sup><sup>21</sup>. Waist-hip ratio (WHR) was calculated as waist circumference (WC) in centimetres divided by hip circumference (HC) in centimetres and classified as high when WHR was  $\geq 0.85$  and  $\geq 0.90$  for women and men respectively<sup>21</sup>.

## Patient and Public Involvement

We did not directly involve patients in the design, recruitment to and conduct of the study. However, the development of the research question and outcome measures were informed by patients' priorities, experience, and preferences. These were realised during the regular diabetes support group meetings where the authors of this study interact with patients and their families. Investigators working at the clinic will discuss the study findings with colleagues and provide them with critical results for sharing with patients (study participants). In close collaboration with the patient support group, the investigation team will summarize the results in plain language for a large poster and place it in a waiting room.

## Statistical analysis

We performed analyses using Stata, Version 14 (Stata Corp, College Station, TX). We used percentages to summarise categorical variables. Means and standard deviation (SD) or medians and interquartile range (IQR) were used to summarise continuous variables. Pearson's  $\chi^2$  or Fisher's exact tests were used to assessing statistical differences by gender for the categorical variables, while the Student's t-test or the Mann-Whitney U test were used for the continuous ones. Bivariate logistic regression was used to explore factors associated with each primary outcome - glycaemic, hypertension and LDL-C control. We further performed three multivariate logistic regression models for each of the three outcomes. The independent variables selected for multivariate models were those displaying a p-value  $< 0.2$  at the univariate analysis level in addition to those considered clinically meaningful (age and gender). We described results as crude odds ratio (OR), adjusted odds ratio (AOR), and their corresponding 95% confidence intervals (95% CI). We used the Hosmer-Lemeshow goodness-of-fit test to assess how well the data fit the model<sup>22</sup>. A 2-tailed p-value  $< 0.05$  was considered statistically significant.

## **Results**

The response rate was 97%, as only 17 (3.4%) of the approached participants declined participation because of time constraints. We included 500 patients with type 2 diabetes in the study, of which 330 (66%) were females. The mean (SD) age was 58.9 (12.2) years, and 78.2% were aged  $> 50$  years. The median (IQR) diabetes duration was 6 (2 - 13) years. There was a high percentage of patients with hypertension (80.8%), overweight (31.1%) and obesity (50.2%). Table 1 summarises the patients' characteristics by gender. Female patients tended to be older (60.8 vs 55.4 years,  $p < 0.001$ ), obese (56.7% vs 37.1%,  $p < 0.001$ ), have higher WHR (95.2% vs 55.9%), be hypertensive (86.1% vs 70.6%,  $p < 0.001$ ), and have a higher mean total cholesterol (4.5mmol/L vs 4.3mmol/L,  $p = 0.030$ ) and LDL-C (2.9 mmol/L vs 2.6 mmol/L,  $p = 0.006$ ) than male patients. Urine dipstick was positive for protein in 10.2% of patients, mostly males (15.9% vs 7.3%,  $p = 0.003$ ).

**[Table 1: Clinical and socio-demographic characteristics of patients with type 2 diabetes at a specialised Diabetes clinic in Gaborone (N= 500)]**

### **Optimal glycaemic control**

The mean (SD) HbA1c was 8.4 % (2.4) overall, 8.6% (2.7) for female and 8.0% (1.6) for male patients ( $p=0.199$ ) [Table 1]. The proportion of the patients receiving oral hypoglycaemic agents alone was 54.2%; 30% were on oral hypoglycaemic agents combined with insulin; 13.6% on insulin alone and 2.2% were on a diet alone. Of the 218 patients on insulin, 184 (84.4%) were on premix insulin. Of the 421 patients on oral hypoglycaemic agents, 411(97.6%) patients were on metformin, and 194 (46.1%) patients were on a sulphonylurea. Compared to patients on other anti-diabetic medications, those on insulin injections were

more likely to be males. We noted optimal glycaemic control in 159 (32.3%) patients, whose mean HbA1c was 6.1 %. Age over 50 years was associated with optimal glycaemic control (AOR 5.79; 95%CI 1.08 - 31.14). On the other hand, an increase in diabetes duration was inversely associated with optimal glycaemic control (AOR 0.91; 95%CI 0.85 - 0.98). There was no association between gender, anthropometry, diabetes medications or education on the level of glycaemic control [Table 2].

**[Table 2: Factors associated with optimal glycaemic control among patients with type 2 diabetes at a specialised diabetes clinic in Gaborone (N= 500)]**

**Optimal hypertension control**

There were 404 (80.8%) hypertensive patients [Table 1]. Age  $\geq$  50 years (AOR 4.95; 95%CI 2.81- 8.73), increased WHR (AOR 3.87; 95%CI 1.72 - 8.71), eGFR (AOR 0.98; 95% CI 0.97 - 0.99), and a long diabetes duration (AOR= 1.07, 95% CI 1.02 - 1.12) were associated with hypertension. Seventeen (4.2%) hypertensive patients did not receive any antihypertensive medication. Of the 389 patients who received antihypertensive medications, 219 (56.3%) received calcium channel blockers, 189 (48.6%) were treated with thiazides diuretics, 183(47.0%) with angiotensin-converting-enzyme inhibitors (ACE inhibitors), and 74(19.0%) with Angiotensin II receptor blockers (ARBs). The proportions of patients receiving  $\beta$ - and  $\alpha$ -blockers were 22.4% and 5.4% respectively.

Of the 389 patients who received antihypertensive medicines, optimal hypertension control was noted in 211 (54.2%) patients. Patients on ACE inhibitors were less likely to attain optimal hypertension control compared to those who were not on ACE inhibitors (AOR 0.24; 95% CI (0.09 - 0.59). There was no association between gender, anthropometry, or education on the level of hypertension control [Table 3].

**[Table 3: Factors associated with optimal hypertension control among patients with type 2 diabetes at a specialised diabetes clinic in Gaborone (N= 500)]**

**Optimal LDL-C control**

A total of 225 (45%) patients were receiving lipid-lowering drugs, mostly (96.4%) atorvastatin. Of these, 147 (65.3%) patients had LDL-C measurements available. Only 30 (20.4%) achieved the optimal LDL-C control target. Females were less likely to achieve optimal LDL-C control as compared to males, (0.24; 95% CI (0.09 - 0.59). There was no association of age, anthropometry, or education on the level of LDL-C control [Table 4].

1  
2  
3 **[Table 4: Factors associated with optimal LDL-C control among patients with type 2 diabetes at a**  
4 **specialised diabetes clinic in Gaborone (N= 500)]**  
5

6  
7 **Discussion**  
8

9 This outpatient cross-sectional study showed a low proportion of patients with optimal control of glycaemic,  
10 hypertension, and LDL-C among Type 2 patients attending a diabetes clinic in Botswana. In the multivariate  
11 analysis, duration of diabetes and age above 50 years were significantly associated with optimal glycaemic  
12 control. Being on ACE inhibitors was inversely related to optimal hypertension control. Females were less  
13 likely to attain optimal LDL-C levels than males.  
14

15  
16 Only 32.3% of our participants achieved optimal glycaemic control. Similarly, low levels of glycaemic  
17 control have also been seen among patients with diabetes in Africa<sup>10 12 23 24</sup>. The proportion of patients  
18 with optimal glycaemic control (HbA1c < 6.5%) in specialised diabetes care centres across six sub-  
19 Saharan African countries was reported to be 29%<sup>12</sup>. Similarly, only 7-20% of patients attained optimal  
20 glycaemic control (HbA1c level < 7%) in South African diabetic clinics<sup>11 24</sup>.  
21

22  
23 Consequently, suboptimal glycaemic levels are an apparent concern not only in Botswana but also in other  
24 African countries. In most studies, the majority of the patients have HbA1c > 8%, well above the  
25 recommended target (<7%) required to avoid the development of microvascular and macrovascular  
26 complications<sup>11 12</sup>. This suboptimal glycaemic control could explain the four and tenfold prevalence of  
27 sight-threatening diabetic retinopathy and proliferative retinopathy respectively found among African  
28 populations compared to their European counterparts<sup>25</sup>. Despite poor glycaemic control level, only a  
29 few of our patients were on insulin, suggesting clinical inertia of our clinicians in response to low  
30 glycaemic control<sup>26</sup>. We will be investigating this further given concerns with the lack of glycaemic control  
31 in our patients. Similar to other studies in Sub-Saharan Africa, the likelihood of attaining optimal  
32 glycaemic control decreased as the duration of diabetes increased<sup>27</sup>. There is evidence of a progressive  
33 loss of beta-cell function with increasing diabetes duration<sup>6</sup>. Insulin production progressively declines  
34 over time, leading to suboptimal glycaemic control unless higher dosages or additional agents are initiated  
35  
36  
37  
38  
39  
40  
41  
42  
43  
44  
45  
46  
47  
48  
49  
50  
51  
52  
53  
54  
55  
56  
57  
58  
59  
60

51 We also found a high prevalence (80.8%) of hypertension among patients attending our specialised diabetes  
52 clinic. A decade ago, the prevalence of hypertension among patients with diabetes in this setting was 61.2%  
53  
54  
55  
56  
57  
58  
59  
60

1  
2  
3 the improvement in the screening and diagnosis of hypertension over the past few years<sup>31</sup>. We are aware  
4 of the comparable high frequencies of hypertension in other African studies<sup>12</sup>. Consistent with previous  
5 studies, patients with hypertension were older, more obese, and had declining GFR and longer diabetes  
6 duration<sup>10 32</sup>. Thiazide diuretics, calcium channel blockers and ACE inhibitors were the three most  
7 prescribed antihypertensive agents. This finding is in line with the available evidence recommending  
8 thiazide diuretics and calcium channels blockers as the most effective antihypertensives in the black  
9 population<sup>16 17 32</sup>. Optimal hypertension control was observed in only 54.2% of the patients on  
10 antihypertensives, suggesting an urgent need for initiatives to improve the identification and control of  
11 hypertension. This low control level is a concern given the increased mortality if hypertension is not  
12 controlled<sup>5</sup>. Having said this, the proportion of patients with optimal hypertension control in our population  
13 was superior to several studies in Africa, notwithstanding the variation of the definitions of optimal  
14 hypertension control across these studies<sup>10 12 13 32 33</sup>. However, there is no room for complacency. In the  
15 present study, the use of ACE inhibitors was inversely associated with optimal hypertension control.  
16 Although ACE inhibitors are indicated for patients with diabetes and proteinuria, they have a clinically  
17 significant lesser reduction in both systolic and diastolic blood pressure in the black population. This could  
18 partly explain suboptimal hypertension control among predominantly black patients in our study. There  
19 appeared to be no influence of gender on hypertension control similar to other studies<sup>34</sup>, which is  
20 encouraging as a recent systematic review found that males in low and middle income countries (LMICs)  
21 are more likely to be non-adherent to their medications<sup>35 36</sup>.

22  
23  
24  
25  
26  
27  
28  
29  
30  
31  
32  
33  
34 Less than half of the patients (45%) were on lipid-lowering drugs, mostly statins. This is not surprising as  
35 the prescription of lipid-lowering medications in Africa is as low as 3 - 13% in patients with diabetes due  
36 to the limited access to these drugs as well as lack of facilities for monitoring lipid profiles while patients  
37 are on treatment<sup>12 36 37</sup>. It is, however, a concern as the reduced use of statins will increase mortality rates  
38 in patients with diabetes<sup>7</sup>. In some countries, the issue of co-payments limits the prescription of expensive  
39 medications like statins<sup>38</sup>. However, this is not an issue in Botswana where medications are provided free  
40 of charge to patients. Although the lack of co-payments might have led to a higher prescription of statins  
41 in Botswana than in other African countries, we would expect the rate of statin prescriptions to mirror the  
42 high rates seen in Western countries<sup>39</sup>. Education and adherence to guidelines will possibly improve the  
43 prescription and use of statins among the majority of patients with diabetes according to treatment  
44 guidelines<sup>16 18</sup>. Even when statins were used, an undesirably small proportion of our patients achieved  
45 guideline-recommended LDL-C target level. Suboptimal LDL-C control rates are also frequent across  
46 different settings, even in developed countries<sup>8 12 40 41</sup>. This is disappointing as achieving LDL-C reduction  
47 is associated with the highest cardiovascular risk reduction than hypertension and HbA1c reduction<sup>8</sup>.  
48 Inadequate patients' adherence and possibly clinicians' under-dosage of statin for fear of potential side  
49  
50  
51  
52  
53  
54  
55  
56  
57

1  
2  
3 effects are some of the factors that possibly explain suboptimal LDL-C control in our patients<sup>8</sup>. Besides,  
4 clinicians may be unaware of the current LDL-C as well as those of HbA1c and hypertension therapeutic  
5 goals<sup>16 18</sup>. Irrespective of the reason, there is an urgent need to instigate measures to meet guideline-  
6 recommended therapeutic goals, and we have started to address this in our clinic. As reported in other  
7 studies, women were less likely than men to achieve optimal LDL-C control<sup>40</sup>. Although the reason for this  
8 gender difference is not apparent, this information is significant for clinicians to pay attention to the  
9 management of women with diabetes in Botswana and other African countries.  
10  
11  
12  
13

### 14 **Conclusion**

15  
16 In conclusion, there was suboptimal glycaemic, hypertension and LDL-C control among patients with  
17 diabetes in our setting. These findings call for urgent individual and health systems interventions to address  
18 the factors associated with suboptimal control of the cardiovascular risk factors among patients with type 2  
19 diabetes. This will be the subject of future initiatives and research in our clinic given the growing prevalence  
20 of patients with type 2 diabetes in Botswana.  
21  
22  
23

### 24 **Funding**

25  
26 This research received no specific grant from any funding agency in public, commercial or not-for-profit  
27 sectors.  
28

### 29 **Competing Interests statement**

30 Dr Mwita has nothing to disclose.

31 Dr Msafiri has nothing to disclose.

32 Dr Omech has nothing to disclose.

33 Dr Botsile has nothing to disclose.

34 Dr Oyewo has nothing to disclose.

35 Dr Godman has nothing to disclose.

36 Dr Tshikuka has nothing to disclose.  
37  
38  
39  
40  
41

### 42 **Acknowledgements**

43 We sincerely thank sister Lasty Mbulawa and Dr Sweta Jammalamadugu for their assistance in data  
44 collection. Also, we appreciate the other staff at the diabetes clinic for their help and the participants for  
45 their time and patience to be part of the study.  
46  
47

### 48 **Author contributions**

49 JCM was involved in the conception of the study, data analysis, drafting and revising the manuscript. BO  
50 was involved in the design of the study and critical revision of the manuscript. AO, MM participated in the  
51 design of the study, data collection and critical revision of the manuscript. JMF participated in data analysis  
52 and manuscript review. EB performed data entry and management, and critical revision of the manuscript.  
53 OJM, BG, and JGT were involved in the interpretation of the data and manuscript revision. All the authors  
54  
55  
56  
57  
58  
59  
60



1  
2  
3 granted final approval of the version to be published; and agreed to be accountable for all aspects of the  
4 work in ensuring that questions related to the accuracy or integrity of any part of the work are appropriately  
5 investigated and resolved.  
6  
7

### 8 9 **Data sharing statement**

10 The dataset analysed during the current study is available from the corresponding author on reasonable  
11 request, through the Princess Marina Hospital and Ministry of Health of Botswana ethical approval.  
12  
13

### 14 **References**

- 15  
16 1. International Diabetes Federation. IDF Diabetes Atlas, 8th edition. 2017.  
17 <http://www.diabetesatlas.org> (accessed July 24, 2018).
- 18 2. World Health Organization. Global report on diabetes. 2016.  
19 [http://apps.who.int/iris/bitstream/handle/10665/204871/9789241565257\\_eng.pdf;jsessionid=7534319F5DD126A2E538996187D64045?sequence=1](http://apps.who.int/iris/bitstream/handle/10665/204871/9789241565257_eng.pdf;jsessionid=7534319F5DD126A2E538996187D64045?sequence=1) (accessed August 2, 2018).
- 20 3. Low Wang CC, Hess CN, Hiatt WR, et al. Clinical Update: Cardiovascular Disease in Diabetes  
21 Mellitus: Atherosclerotic Cardiovascular Disease and Heart Failure in Type 2 Diabetes  
22 Mellitus - Mechanisms, Management, and Clinical Considerations. *Circulation*  
23 2016;133(24):2459-502. doi: <https://doi.org/10.1161/CIRCULATIONAHA.116.022194>  
24 [published Online First: 2016/06/15]
- 25 4. Marks JB, Raskin P. Cardiovascular risk in diabetes: a brief review. *Journal of diabetes and*  
26 *its complications* 2000;14(2):108-15. doi: [https://doi.org/10.1016/S1056-8727\(00\)00065-](https://doi.org/10.1016/S1056-8727(00)00065-9)  
27 [9](https://doi.org/10.1016/S1056-8727(00)00065-9) [published Online First: 2000/08/26]
- 28 5. U.K Prospective Diabetes Study Group. Tight blood pressure control and risk of macrovascular  
29 and microvascular complications in type 2 diabetes: UKPDS 38. *BMJ (Clinical research*  
30 *ed)* 1998;317(7160):703-13. doi: <https://doi.org/10.1136/bmj.317.7160.703> [published  
31 Online First: 1998/09/11]
- 32 6. U.K. Prospective Diabetes Study Group. Overview of 6 years' therapy of type II diabetes: a  
33 progressive disease: UKPDS 16. *Diabetes* 1995;44(11):1249-58. doi:  
34 <https://doi.org/10.2337/diab.44.11.1249> [published Online First: 1995/11/01]
- 35 7. Collins R, Armitage J, Parish S, et al. MRC/BHF Heart Protection Study of cholesterol-  
36 lowering with simvastatin in 5963 people with diabetes: a randomised placebo-controlled  
37 trial. *Lancet (London, England)* 2003;361(9374):2005-16. [published Online First:  
38 2003/06/20]
- 39 8. Wan EYF, Fung CSC, Yu EYT, et al. Effect of Multifactorial Treatment Targets and Relative  
40 Importance of Hemoglobin A1c, Blood Pressure, and Low-Density  
41 Lipoprotein-Cholesterol on Cardiovascular Diseases in Chinese Primary Care Patients  
42 With Type 2 Diabetes Mellitus: A Population-Based Retrospective Cohort Study. *Journal*  
43 *of the American Heart Association* 2017;6(8):e006400. doi:  
44 <https://doi.org/10.1161/JAHA.117.006400>
- 45 9. Saydah SH, Fradkin J, Cowie CC. Poor control of risk factors for vascular disease among adults  
46 with previously diagnosed diabetes. *Jama* 2004;291(3):335-42. doi:  
47 <https://doi.org/10.1001/jama.291.3.335> [published Online First: 2004/01/22]  
48  
49  
50  
51  
52  
53  
54  
55  
56  
57  
58  
59  
60

10. Mwitwa JC, Mugusi F, Lwakatare J, et al. Hypertension control and other cardiovascular risk factors among diabetic patients at Muhimbili National Hospital, Tanzania. *East African journal of public health* 2012;9(2):70-73.
11. Klisiewicz A, Raal F. Sub-optimal management of type 2 diabetes mellitus—a local audit. *Journal of Endocrinology, Metabolism and Diabetes of South Africa* 2009;14(1)
12. Sobngwi E, Ndour-Mbaye M, Boateng KA, et al. Type 2 diabetes control and complications in specialised diabetes care centres of six sub-Saharan African countries: the Diabcare Africa study. *Diabetes research and clinical practice* 2012;95(1):30-36. doi: <https://doi.org/10.1016/j.diabres.2011.10.018> [published Online First: 2011/11/11]
13. Kibirige D, Atuhe D, Sebunya R, et al. Suboptimal glycaemic and blood pressure control and screening for diabetic complications in adult ambulatory diabetic patients in Uganda: a retrospective study from a developing country. *Journal of Diabetes & Metabolic Disorders* 2014;13(1):40.
14. World Health Organization. The Abuja declaration: ten years on. 2011. 2016. [http://www.who.int/healthsystems/publications/abuja\\_report\\_aug\\_2011.pdf?ua=1](http://www.who.int/healthsystems/publications/abuja_report_aug_2011.pdf?ua=1) (accessed August 25, 2018).
15. Chobanian AV, Bakris GL, Black HR, et al. The Seventh Report of the Joint National Committee on Prevention, Detection, Evaluation, and Treatment of High Blood Pressure: the JNC 7 report. *Jama* 2003;289(19):2560-72. doi: <https://doi.org/10.1001/jama.289.19.2560> [published Online First: 2003/05/16]
16. SEMDSA Type 2 Diabetes Guidelines Expert Committee. SEMDSA 2017 guidelines for the management of type 2 diabetes mellitus. *J Endocr Metab Diabetes S Afr* 2017;22(1 Suppl 1):S1-S196.
17. James PA, Oparil S, Carter BL, et al. 2014 evidence-based guideline for the management of high blood pressure in adults: Report from the panel members appointed to the eighth joint national committee (JNC 8). *Jama* 2014;311(5):507-20. doi: <https://doi.org/10.1001/jama.2013.284427> [published Online First: 2013/12/20]
18. American Diabetes Association. Standards of Medical Care in Diabetes-2017 Abridged for Primary Care Providers. *Clinical diabetes: a publication of the American Diabetes Association* 2017;35(1):5-26. doi: <https://doi.org/10.2337/cd16-0067> [published Online First: 2017/02/02]
19. Work Group and Evidence Review Team Membership. K/DOQI clinical practice guidelines for chronic kidney disease: evaluation, classification, and stratification. *American journal of kidney diseases: the official journal of the National Kidney Foundation* 2002;39(2 Suppl 1):S1-266. doi: [https://doi.org/10.1016/S0272-6386\(02\)70084-X](https://doi.org/10.1016/S0272-6386(02)70084-X) [published Online First: 2002/03/21]
20. Levey AS, Greene T, Schluchter MD, et al. Glomerular filtration rate measurements in clinical trials. Modification of Diet in Renal Disease Study Group and the Diabetes Control and Complications Trial Research Group. *Journal of the American Society of Nephrology: JASN* 1993;4(5):1159-71. [published Online First: 1993/11/01]
21. World Health Organization. Waist circumference and waist-hip ratio: report of a WHO expert consultation, Geneva, 8-11 December 2008. 2011. <http://www.who.int/iris/handle/10665/44583> (accessed 27/08/2018).
22. Hosmer DW, Hosmer T, Le Cessie S, et al. A comparison of goodness-of-fit tests for the logistic regression model. *Statistics in medicine* 1997;16(9):965-80. [published Online First: 1997/05/15]

23. Adeniyi OV, Yogeswaran P, Longo-Mbenza B, et al. Cross-sectional study of patients with type 2 diabetes in OR Tambo district, South Africa. *BMJ open* 2016;6(7):e010875. doi: <http://dx.doi.org/10.1136/bmjopen-2015-010875> [published Online First: 2016/07/31]
24. Erasmus RT, Blanco Blanco E, Okesina AB, et al. Assessment of glycaemic control in stable type 2 black South African diabetics attending a peri-urban clinic. *Postgraduate medical journal* 1999;75(888):603-6. doi: <http://dx.doi.org/10.1136/pgmj.75.888.603> [published Online First: 2000/01/06]
25. Burgess PI, Allain TJ, García-Fiñana M, et al. High prevalence in Malawi of sight-threatening retinopathy and visual impairment caused by diabetes: identification of population-specific targets for intervention. *Diabetic Medicine* 2014;31(12):1643-50. doi: <http://dx.doi.org/10.1111/dme.12492>
26. Shah BR, Hux JE, Laupacis A, et al. Clinical inertia in response to inadequate glycaemic control: do specialists differ from primary care physicians? *Diabetes care* 2005;28(3):600-6. doi: <http://dx.doi.org/10.2337/diacare.28.3.600> [published Online First: 2005/03/01]
27. Camara A, Balde NM, Sobngwi-Tambekou J, et al. Poor glycaemic control in type 2 diabetes in the South of the Sahara: the issue of limited access to an HbA1c test. *Diabetes Res Clin Pract* 2015;108(1):187-92. doi: <https://doi.org/10.1016/j.diabres.2014.08.025> [published Online First: 2015/02/24]
28. El-Kebbi IM, Cook CB, Ziemer DC, et al. Association of younger age with poor glycaemic control and obesity in urban African Americans with type 2 diabetes. *Archives of internal medicine* 2003;163(1):69-75. doi: <https://doi.org/10.1001/archinte.163.1.69> [published Online First: 2003/01/14]
29. Fox KM, Gerber Pharmd RA, Bolinder B, et al. Prevalence of inadequate glycaemic control among patients with type 2 diabetes in the United Kingdom general practice research database: A series of retrospective analyses of data from 1998 through 2002. *Clinical therapeutics* 2006;28(3):388-95. doi: <https://doi.org/10.1016/j.clinthera.2006.03.005> [published Online First: 2006/06/06]
30. Mengesha AY. Hypertension and related risk factors in type 2 diabetes mellitus (DM) patients in Gaborone City Council (GCC) clinics, Gaborone, Botswana. *African health sciences* 2008;7(4)
31. Forouzanfar MH, Liu P, Roth GA, et al. Global Burden of Hypertension and Systolic Blood Pressure of at Least 110 to 115 mm Hg, 1990-2015. *Jama* 2017;317(2):165-82. doi: <https://doi.org/10.1001/jama.2016.19043> [published Online First: 2017/01/18]
32. Choukem SP, Kengne AP, Dehayem YM, et al. Hypertension in people with diabetes in sub-Saharan Africa: revealing the hidden face of the iceberg. *Diabetes Res Clin Pract* 2007;77(2):293-9. doi: <http://dx.doi.org/10.1016/j.diabres.2006.11.007> [published Online First: 2006/12/23]
33. Adeniyi OV, Yogeswaran P, Longo-Mbenza B, et al. Uncontrolled Hypertension and Its Determinants in Patients with Concomitant Type 2 Diabetes Mellitus (T2DM) in Rural South Africa. *PloS one* 2016;11(3):e0150033. doi: <http://dx.doi.org/10.1371/journal.pone.0150033> [published Online First: 2016/03/02]
34. Nashilongo MM, Singu B, Kalemeera F, et al. Assessing Adherence to Antihypertensive Therapy in Primary Health Care in Namibia: Findings and Implications. *Cardiovascular drugs and therapy* 2017;31(5-6):565-78. doi: <https://doi.org/10.1007/s10557-017-6756-8>. [published Online First: 2017/10/17]

- 1  
2  
3  
4  
5  
6  
7  
8  
9  
10  
11  
12  
13  
14  
15  
16  
17  
18  
19  
20  
21  
22  
23  
24  
25  
26  
27  
28  
29  
30  
31  
32  
33  
34  
35  
36  
37  
38  
39  
40  
41  
42  
43  
44  
45  
46  
47  
48  
49  
50  
51  
52  
53  
54  
55  
56  
57  
58  
59  
60
35. Nielsen JO, Shrestha AD, Neupane D, et al. Non-adherence to anti-hypertensive medication in low- and middle-income countries: a systematic review and meta-analysis of 92443 subjects. *Journal of human hypertension* 2017;31(1):14-21. doi: <https://doi.org/10.1038/jhh.2016.31> [published Online First: 2016/06/17]
  36. Gudina EK, Amade ST, Tesfamichael FA, et al. Assessment of quality of care given to diabetic patients at Jimma University Specialized Hospital diabetes follow-up clinic, Jimma, Ethiopia. *BMC endocrine disorders* 2011;11:19. doi: <http://dx.doi.org/10.1186/1472-6823-11-19> [published Online First: 2011/12/22]
  37. Uloko AE, Ofoegbu EN, Chinenye S, et al. Profile of Nigerians with diabetes mellitus - Diabcare Nigeria study group (2008): Results of a multicenter study. *Indian journal of endocrinology and metabolism* 2012;16(4):558-64. doi: 10.4103/2230-8210.98011 [published Online First: 2012/07/28]
  38. Simoens S, Sinnaeve PR. Patient co-payment and adherence to statins: a review and case studies. *Cardiovascular drugs and therapy* 2014;28(1):99-109. doi: <http://dx.doi.org/10.1007/s10557-013-6497-2> [published Online First: 2013/10/24]
  39. Pokharel Y, Akeroyd JM, Ramsey DJ, et al. Statin Use and Its Facility-Level Variation in Patients With Diabetes: Insight From the Veterans Affairs National Database. *Clinical cardiology* 2016;39(4):185-91. doi: <http://dx.doi.org/10.1002/clc.22503> [published Online First: 2016/04/10]
  40. Pinchevsky Y, Shukla V, Butkow N, et al. The achievement of glycaemic, blood pressure and LDL cholesterol targets in patients with type 2 diabetes attending a South African tertiary hospital outpatient clinic. *Journal of Endocrinology, Metabolism and Diabetes of South Africa* 2015;20(2):81-86. doi: <http://dx.doi.org/10.1080/16089677.2015.1056468>
  41. Pinchevsky Y, Butkow N, Chirwa T, et al. Glycaemic, blood pressure and cholesterol control in 25 629 diabetics. *Cardiovascular journal of Africa* 2015;26(4):188-92. doi: <http://dx.doi.org/10.5830/cvja-2015-050> [published Online First: 2015/09/26]

**Table 1: Clinical and socio-demographic characteristics of patients with type 2 diabetes at a specialised Diabetes clinic in Gaborone (N= 500)**

| Characteristics                                | All (N=500)       | Males (n= 170)     | Females (n= 330)    | p-value      |
|------------------------------------------------|-------------------|--------------------|---------------------|--------------|
| Mean age (SD), years                           | 58.9 (12.2)       | 55.4 (12.6)        | 60.8(11.6)          | <0.001       |
| Age <50 years n (%)                            | 109(21.80)        | 57 (33.5)          | 52 (15.8)           | <0.001       |
| Age ≥ 50 years n (%)                           | 391 (78.20)       | 113 (66.5)         | 278(84.2)           |              |
| Diabetes duration, median, IQR, years          | 6 (2 - 13)        | 6.5 (2 - 14)       | 6 (2.5 - 13)        | 0.927        |
| HbA1c mean (SD), %                             | 8.4 (2.4)         | 8.6 (2.7)          | 8.4 (2.4)           | 0.199        |
| Diabetes treatment                             |                   |                    |                     |              |
| Diet alone n (%)                               | 11(2.2)           | 3(1.8)             | 8 (2.4)             | <b>0.001</b> |
| Insulin alone n (%)                            | 68 (13.6)         | 38(22.3)           | 30 (9.1)            |              |
| OHA alone n (%)                                | 271(54.2)         | 82(48.2)           | 189 (57.3)          |              |
| Insulin and OHA                                | 150 (30.0)        | 47(27.7)           | 103(31.2)           |              |
| BMI, mean (SD) kg/m <sup>2</sup>               | 30.5(6.0)         | 28.7(5.2)          | 31.4(6.2)           | <0.001       |
| Normal weight n (%)                            | 93 (18.7)         | 46(27.1)           | 49 (14.9)           | <0.001       |
| Overweight n (%)                               | 155(31.1)         | 61(36.3)           | 94 (28.5)           |              |
| Obese n (%)                                    | 250(50.2)         | 63 (37.1)          | 187(56.7)           |              |
| Marital status                                 |                   |                    |                     |              |
| Living alone n (%)                             | 266 (53.20)       | 55 (32.4)          | 211(63.9)           | <0.001       |
| Living with a partner n (%)                    | 234(46.8)         | 115 (67.6)         | 119(36.01)          |              |
| Education status                               |                   |                    |                     |              |
| No formal education, n (%)                     | 77(15.4)          | 26(15.3)           | 51 (15.5)           | <0.001       |
| Primary School, n (%)                          | 229(45.8)         | 56 (32.9)          | 173 (52.4)          |              |
| Secondary school, n (%)                        | 131(26.2)         | 55(32.4)           | 76 (23.0)           |              |
| College/University, n (%)                      | 63(12.6)          | 33 (19.4)          | 30 (9.1)            |              |
| WC, mean (SD), cm                              | 103.3(12.5)       | 101.7 (11.9)       | 104.0 (12.7)        | <b>0.049</b> |
| WHR                                            | 0.94(0.10)        | 0.97(0.09)         | 0.93(0.10)          | <0.001       |
| Low WHR n (%)                                  | 75 (44.1)         | 16(4.9)            |                     | <0.001       |
| High WHR n (%)                                 | 95 (55.9)         | 314(95.2)          |                     |              |
| CKD n (%)                                      | 54 (10.8)         | 24 (14.1)          | 30 (9.1)            | <b>0.086</b> |
| eGFR, Median, IQR (ml/min/1.73m <sup>2</sup> ) | 112.5(84.3-138.1) | 113.1(80.8 -139.5) | 112.3(84.4 - 137.9) | 0.737        |
| Cholesterol, mean (SD), mmol/L                 | 4.4(1.1)          | 4.3(1.2)           | 4.5(1.1)            | <b>0.030</b> |
| LDL-C mean (SD), mmol/L                        | 2.8(1.0)          | 2.6(1.0)           | 2.9(1.0)            | <b>0.006</b> |
| Macroproteinuria n (%)                         | 51(10.20)         | 27 (15.9)          | 24(7.27)            | <b>0.003</b> |
| Hypertension n (%)                             | 404 (80.80)       | 120 (70.59)        | 284(86.06)          | <0.001       |
| Dyslipidaemia n (%)                            | 358 (71.60)       | 114 (67.06)        | 244(73.94)          | 0.106        |

**Legend:** DM - Diabetes mellitus; WC- waist circumference; BMI- Body Mass Index; SD- standard deviation; IQR – interquartile range; eGFR- estimated glomerular filtration rate; LDL-C – Low-density lipoprotein; WHR – Waist-hip ratio, HbA1c- Haemoglobin A1c; CKD- Chronic kidney disease; OHA – oral hypoglycaemic agent

**Table 2: Factors associated with optimal glycaemic control among patients with type 2 diabetes at a specialised diabetes clinic in Gaborone (N= 500)**

| Characteristic                     | Unadjusted OR (95% CI) | p-value          | Adjusted OR (95%CI) | p-value      |
|------------------------------------|------------------------|------------------|---------------------|--------------|
| Age group                          |                        |                  |                     |              |
| > 50 years                         | 1                      |                  |                     |              |
| ≤ 50 years                         | 2.16(1.29 - 3.61)      | <b>0.003</b>     | 5.79 (1.08 - 31.14) | <b>0.041</b> |
| Diabetes duration, years           | 0.97(0.95 - 0.99)      | <b>0.040</b>     | 0.91 (0.85 - 0.98)  | <b>0.011</b> |
| Use of Insulin alone               |                        |                  |                     |              |
| No                                 | 1                      |                  |                     |              |
| Yes                                | 0.80(0.45- 1.43)       | 0.590            |                     |              |
| Use of OHA alone                   |                        |                  |                     |              |
| No                                 | 1                      |                  |                     |              |
| Yes                                | 2.785 (1.862 - 4.167)  | <b>&lt;0.001</b> | 0.90 (0.46 - 1.74)  | 0.745        |
| Use of Insulin plus OHA            |                        |                  |                     |              |
| No                                 | 1                      |                  |                     |              |
| Yes                                | 0.185 (0.124 - 0.356)  | <b>&lt;0.001</b> | 0.34 (0.07 - 1.70)  | 0.188        |
| BMI                                | 0.99(0.96 - 1.02)      | 0.427            | –                   | –            |
| Normal weight                      | 1                      | –                | –                   | –            |
| Overweight                         | 1.10 (0.64 - 1.90)     | 0.721            | –                   | –            |
| Obese                              | 0.83(0.50 - 1.39)      | 0.476            | –                   | –            |
| Gender                             |                        |                  | –                   | –            |
| Men                                | 1                      | –                | –                   | –            |
| Women                              | 0.92(0.62 - 1.36)      | 0.663            | 0.42 (0.14 - 1.25)  | 0.120        |
| Education status                   |                        |                  |                     |              |
| None                               | 1                      | 1                | –                   | –            |
| Primary School                     | 1.58(0.88 - 2.81)      | 0.124            | –                   | –            |
| Secondary school                   | 1.14 (0.60 - 2.16)     | 0.687            | –                   | –            |
| College/University                 | 1.00(0.47 - 2.13)      | 0.996            | –                   | –            |
| Marital status                     |                        |                  |                     |              |
| Living alone                       | 1                      | –                | –                   | –            |
| Living with a partner              | 0.93 (0.64 - 1.36)     | 0.703            | –                   | –            |
| WHR                                | 0.92 (0.13 - 6.58)     | 0.937            | –                   | –            |
| Low WHR                            | 1                      | –                | –                   | –            |
| High WHR                           | 0.92(0.57 - 1.50)      | 0.745            | –                   | –            |
| Weight, kg                         | 0.99 (0.98 - 1.01)     | 0.298            | –                   | –            |
| eGFR, (ml/min/1.73m <sup>2</sup> ) | 1.00 (0.99 - 1.00)     | 0.074            | 1.00(0.99 - 1.01)   | 0.766        |
| CKD                                |                        |                  |                     |              |
| No                                 | 1                      |                  |                     |              |
| Yes                                | 1.053 (0.578 - 1.920)  | 0.866            | –                   | –            |
| Macroproteinuria                   |                        |                  |                     |              |
| No                                 | 1                      |                  | –                   |              |
| Yes                                | 1.16(0.63 - 2.14)      | 0.624            | –                   | –            |
| Optimal hypertension control       |                        |                  |                     |              |
| No                                 | 1                      |                  | –                   |              |
| Yes                                | 2.53 (1.63 - 3.93)     | <b>&lt;0.001</b> | 1.61(0.63 - 4.13)   | 0.322        |
| Optimal LDL-C control              |                        |                  |                     |              |
| No                                 | 1                      |                  |                     |              |
| Yes                                | 2.10 (0.90 - 4.88)     | 0.086            | 2.20 (0.64 - 7.57)  | 0.209        |

1  
2  
3  
4  
5  
6  
7  
8  
9  
10  
11  
12  
13  
14  
15  
16  
17  
18  
19  
20  
21  
22  
23  
24  
25  
26  
27  
28  
29  
30  
31  
32  
33  
34  
35  
36  
37  
38  
39  
40  
41  
42  
43  
44  
45  
46  
47  
48  
49  
50  
51  
52  
53  
54  
55  
56  
57  
58  
59  
60

**Legend:** Legend: BMI- Body Mass Index; CKD- Chronic kidney disease; DM - Diabetes mellitus; eGFR- estimated glomerular filtration rate; IQR – interquartile range; LDL-C – Low-density lipoprotein; OHA – oral hypoglycaemic agent; SD- standard deviation; WHR – Waist-hip ratio.

For peer review only

**Table 3: Factors associated with optimal hypertension control among patients with type 2 diabetes at a specialised diabetes clinic in Gaborone (N= 500)**

| Characteristic                                 | Unadjusted OR (95% CI) | p-value       | Adjusted OR (95% CI) | p-value      |
|------------------------------------------------|------------------------|---------------|----------------------|--------------|
| Age group                                      |                        |               |                      |              |
| < 50 years                                     | 1                      | –             | –                    | –            |
| ≥50 years                                      | 0.89(0.48 - 1.62)      | 0.691         | –                    | –            |
| Diabetes duration, years                       | 0.97(0.94 - 0.99)      | <b>0.023</b>  | 0.98 (0.92 - 1.03)   | 0.352        |
| Use of Insulin alone                           |                        |               |                      |              |
| No                                             | 1                      | –             | –                    | –            |
| Yes                                            | 0.45 (0.24 - 0.82)     | <b>0.009</b>  | 1.15 (0.30 - 4.44)   | 0.837        |
| Use of OHA alone                               |                        |               |                      |              |
| No                                             | 1                      | –             | –                    | –            |
| Yes                                            | 1.94 (1.30 - 2.91)     | <b>0.001</b>  | 1.37 (0.51 - 3.66)   | 0.531        |
| Use of Insulin plus OHA                        |                        |               |                      |              |
| No                                             | 1                      | –             | –                    | –            |
| Yes                                            | 0.59 (0.40 - 0.95)     | <b>0.028*</b> | –                    | –            |
| BMI, kg/m <sup>2</sup>                         | 0.98 (0.94 - 1.01)     | 0.149         | 0.93(0.86 - 1.01)    |              |
| Normal weight                                  | 1                      | –             | –                    | –            |
| Overweight                                     | 0.79 (0.42 - 1.47)     | 0.449         | –                    | –            |
| Obese                                          | 0.77(0.44 -1.38)       | 0.384         | –                    | –            |
| Gender                                         |                        |               |                      |              |
| Men                                            | 1                      | –             | –                    | –            |
| Women                                          | 1.43(0.92 - 2.22)      | 0.117         | 0.97 (0.36 - 2.61)   | 0.949        |
| Marital                                        |                        |               |                      |              |
| Living alone                                   | 1                      | –             | –                    | –            |
| Living with a partner                          | 0.68 (0.61 - 1.37)     | 0.67          | –                    | –            |
| Education status                               |                        |               |                      |              |
| No formal education                            | 1                      | –             | –                    | –            |
| Primary School                                 | 1.03(0.58 - 1.83)      | 0.09          | –                    | –            |
| Secondary school                               | 1.08(0.56 - 2.09)      | 0.22          | –                    | –            |
| College/University                             | 0.89(0.41 - 1.92)      | 0.761         | –                    | –            |
| WHR                                            | 1.29 (0.14 - 12.00)    | 0.821         | –                    | –            |
| Low WHR                                        | 1                      | –             | –                    | –            |
| High WHR                                       | 1.18 (0.65 - 2.12)     | 0.589         | –                    | –            |
| eGFR <sub>c</sub> (ml/min/1.73m <sup>2</sup> ) | 1.00 (1.00 - 1.01)     | 0.139         | 1.00(0.99 -1.02)     | 0.412        |
| Serum Cholesterol                              | 0.964 (0.80 - 1.16)    | 0.693         | –                    | –            |
| Macroproteinuria                               |                        |               |                      |              |
| No                                             | 1                      | –             | –                    | –            |
| Yes                                            | 0.48(0.26 - 0.92)      | <b>0.027</b>  | 0.36(0.07 - 1.80)    | 0.213        |
| Use of CCB                                     |                        |               |                      |              |
| No                                             | 1                      | –             | –                    | –            |
| Yes                                            | 0.73(0.72 - 1.61)      | 0.729         | –                    | –            |
| Use of Thiazides                               |                        |               |                      |              |
| No                                             | 1                      | –             | –                    | –            |
| Yes                                            | 1.58(1.06 - 2.37)      | <b>0.026</b>  | 1.44(0.62 - 3.39)    | 0.399        |
| Use of ACE INHIBITORS                          |                        |               |                      |              |
| No                                             | 1                      | –             | –                    | –            |
| Yes                                            | 0.64 (0.43 - 0.95)     | <b>0.028</b>  | 0.35(0.14 - 0.85)    | <b>0.020</b> |
| Use of ARB                                     |                        |               |                      |              |
| No                                             | 1                      | –             | –                    | –            |



|                           |     |                    |                  |                    |       |
|---------------------------|-----|--------------------|------------------|--------------------|-------|
|                           | Yes | 0.95(0.57 - 1.58)  | 0.834            | –                  | –     |
| Alpha blocker             |     |                    |                  |                    |       |
|                           | No  | 1                  | –                | –                  | –     |
|                           | Yes | 0.24(0.09 - 0.68)  | <b>0.007</b>     | 0.76 (0.14 - 4.20) | 0.749 |
| Beta-blocker              |     |                    |                  |                    |       |
|                           | No  | 1                  | –                | –                  | –     |
|                           | Yes | 0.70 (0.43 -1.14)  | 0.149            | 0.51(0.19 - 1.37)  | 0.184 |
| Optimal Glycaemic control |     |                    |                  |                    |       |
|                           | No  | 1                  | –                | –                  | –     |
|                           | Yes | 2.53 (1.63- 3.93)  | <b>&lt;0.001</b> | 1.92 (0.71 - 5.23) | 0.201 |
| Optimal LDL-C control     |     |                    |                  |                    |       |
|                           | No  | 1                  | –                | –                  | –     |
|                           | Yes | 0.55 (0.23 - 1.36) | 0.199            | 0.75 (0.25 - 2.32) | 0.623 |

**Legend:** \* omitted because of collinearity. ACE INHIBITORS – angiotensin-converting-enzyme inhibitor; ARB – Angiotensin II receptor blocker; BMI- Body Mass Index; CCB- Calcium Channel Blockers; DM - Diabetes mellitus; eGFR- estimated glomerular filtration rate; HbA1c- Haemoglobin A1c; IQR – interquartile range; LDL-C – Low-density lipoprotein; OHA – oral hypoglycaemic agent; SD- standard deviation; WHR – Waist-hip ratio.

**Table 4: Factors associated with optimal LDL-C control among patients with type 2 diabetes at a specialised diabetes clinic in Gaborone (N= 500)**

| Characteristic                     | Unadjusted OR (95% CI) | p-value          | Adjusted OR (95% CI) | p-value      |
|------------------------------------|------------------------|------------------|----------------------|--------------|
| Age group                          |                        |                  |                      |              |
| <50 years                          | 1                      |                  | –                    | –            |
| ≥ 50 years                         | 0.56 (0.21 - 1.50)     | 0.249            | –                    | –            |
| Diabetes duration, years           | 1.02(0. 97 - 1.06)     | 0.525            |                      | –            |
| Use of Insulin alone               |                        |                  |                      |              |
| No                                 | 1                      | –                | –                    | –            |
| Yes                                | 1.58 (0.56 - 4.46)     | 0.389            | –                    | –            |
| Use of OHA alone                   |                        |                  |                      |              |
| No                                 | 1                      | –                | –                    | –            |
| Yes                                | 0.95 (0.43 - 2.12)     | 0.900            | –                    | –            |
| Use of Insulin plus OHA            |                        |                  |                      |              |
| No                                 | 1                      | –                | –                    | –            |
| Yes                                | 0.83 (0.35 - 1.97)     | 0.664            | –                    | –            |
| BMI                                | 1.00 (0.93 -1.07)      | 0.951            |                      | –            |
| Normal weight                      | 1                      | –                | –                    | –            |
| Overweight                         | 1.43 (0.34 - 5.94)     | 0.624            | –                    | –            |
| Obese                              | 1.27(0.33 - 4.89)      | 0.730            | –                    | –            |
| Gender                             |                        |                  |                      |              |
| Men                                | 1                      |                  | –                    | –            |
| Women                              | 0.2 (0.09 - 0.47)      | <b>&lt;0.001</b> | 0.24(0.09- 0.59)     | <b>0.002</b> |
| Education status                   |                        |                  |                      |              |
| No formal education                | 1                      | 1                | –                    | –            |
| Primary School                     | 0.79 (0. 29 - 2.14)    | 0.647            | –                    | –            |
| Secondary school                   | 0.28 (0.07 - 1.20)     | 0.087            | –                    | –            |
| College/University                 | 0.79(0.20 - 3.11)      | 0.731            | –                    | –            |
| Marital status                     |                        |                  |                      |              |
| Living alone                       | 1                      | –                | –                    | –            |
| Living with a partner              | 0.99 (0.44 - 2.20)     | 0.973            | –                    | –            |
| HbA1c                              | 1.00 (0.85 - 0.20)     | 0.917            |                      | –            |
| WHR                                | 7.59(0.19 - 303.60)    | 0.281            | –                    | –            |
| Low WHR                            | 1                      |                  |                      |              |
| High WHR                           | 0.31(0.11 – 0.89)      | <b>0.030</b>     | 0.64(0.20 - 2.10)    | 0.463        |
| Macroproteinuria                   |                        |                  |                      |              |
| No                                 |                        | –                | –                    | –            |
| Yes                                | 0.69 (0.14 - 3.27)     | 0.64             | –                    | –            |
| eGFR, (ml/min/1.73m <sup>2</sup> ) | 1.00(0.99 - 1.01)      | 0.878            | –                    | –            |
| CKD                                |                        |                  |                      |              |
| No                                 | 1                      | –                | –                    | –            |
| Yes                                | 1.88(0. 73 - 4.83)     | 0.193            | 1.67 (0.61 - 4.58)   | 0.321        |
| Hypertension                       |                        |                  |                      |              |
| No                                 |                        | –                | –                    | –            |
| Yes                                | 1.13 (0.30 - 4.23)     | 0.86             | –                    | –            |

**Legend:** Legend: BMI- Body Mass Index; CKD- Chronic kidney disease; DM - Diabetes mellitus; eGFR- estimated glomerular filtration rate; IQR – interquartile range; LDL-C – Low-density lipoprotein; OHA – oral hypoglycaemic agent; SD- standard deviation; WHR–Waist-hip ratio

**STROBE 2007 (v4) Statement—Checklist of items that should be included in reports of *cross-sectional studies***

| Section/Topic             | Item # | Recommendation                                                                                                                                                                       | Reported on page # |
|---------------------------|--------|--------------------------------------------------------------------------------------------------------------------------------------------------------------------------------------|--------------------|
| <b>Title and abstract</b> | 1      | (a) Indicate the study’s design with a commonly used term in the title or the abstract                                                                                               | 1                  |
|                           |        | (b) Provide in the abstract an informative and balanced summary of what was done and what was found                                                                                  | 1                  |
| <b>Introduction</b>       |        |                                                                                                                                                                                      |                    |
| Background/rationale      | 2      | Explain the scientific background and rationale for the investigation being reported                                                                                                 | 2                  |
| Objectives                | 3      | State specific objectives, including any prespecified hypotheses                                                                                                                     | 2                  |
| <b>Methods</b>            |        |                                                                                                                                                                                      |                    |
| Study design              | 4      | Present key elements of study design early in the paper                                                                                                                              | 2                  |
| Setting                   | 5      | Describe the setting, locations, and relevant dates, including periods of recruitment, exposure, follow-up, and data collection                                                      | 2                  |
| Participants              | 6      | (a) Give the eligibility criteria, and the sources and methods of selection of participants                                                                                          | 2                  |
| Variables                 | 7      | Clearly define all outcomes, exposures, predictors, potential confounders, and effect modifiers. Give diagnostic criteria, if applicable                                             | 2                  |
| Data sources/ measurement | 8*     | For each variable of interest, give sources of data and details of methods of assessment (measurement). Describe comparability of assessment methods if there is more than one group | 2                  |
| Bias                      | 9      | Describe any efforts to address potential sources of bias                                                                                                                            | 2                  |
| Study size                | 10     | Explain how the study size was arrived at                                                                                                                                            | 2                  |
| Quantitative variables    | 11     | Explain how quantitative variables were handled in the analyses. If applicable, describe which groupings were chosen and why                                                         | 3                  |
| Statistical methods       | 12     | (a) Describe all statistical methods, including those used to control for confounding                                                                                                | 3                  |
|                           |        | (b) Describe any methods used to examine subgroups and interactions                                                                                                                  | 3                  |
|                           |        | (c) Explain how missing data were addressed                                                                                                                                          |                    |
|                           |        | (d) If applicable, describe analytical methods taking account of sampling strategy                                                                                                   |                    |
|                           |        | (e) Describe any sensitivity analyses                                                                                                                                                |                    |
| <b>Results</b>            |        |                                                                                                                                                                                      | 3                  |

|                          |     |                                                                                                                                                                                                                                                                                                                                                                                                               |     |
|--------------------------|-----|---------------------------------------------------------------------------------------------------------------------------------------------------------------------------------------------------------------------------------------------------------------------------------------------------------------------------------------------------------------------------------------------------------------|-----|
| Participants             | 13* | (a) Report numbers of individuals at each stage of study—eg numbers potentially eligible, examined for eligibility, confirmed eligible, included in the study, completing follow-up, and analysed<br>(b) Give reasons for non-participation at each stage<br>(c) Consider use of a flow diagram                                                                                                               | 3   |
| Descriptive data         | 14* | (a) Give characteristics of study participants (eg demographic, clinical, social) and information on exposures and potential confounders<br>(b) Indicate number of participants with missing data for each variable of interest                                                                                                                                                                               | 4   |
| Outcome data             | 15* | Report numbers of outcome events or summary measures                                                                                                                                                                                                                                                                                                                                                          | 4,5 |
| Main results             | 16  | (a) Give unadjusted estimates and, if applicable, confounder-adjusted estimates and their precision (eg, 95% confidence interval). Make clear which confounders were adjusted for and why they were included<br>(b) Report category boundaries when continuous variables were categorized<br>(c) If relevant, consider translating estimates of relative risk into absolute risk for a meaningful time period | 4,5 |
| Other analyses           | 17  | Report other analyses done—eg analyses of subgroups and interactions, and sensitivity analyses                                                                                                                                                                                                                                                                                                                |     |
| <b>Discussion</b>        |     |                                                                                                                                                                                                                                                                                                                                                                                                               |     |
| Key results              | 18  | Summarise key results with reference to study objectives                                                                                                                                                                                                                                                                                                                                                      | 5   |
| Limitations              | 19  | Discuss limitations of the study, taking into account sources of potential bias or imprecision. Discuss both direction and magnitude of any potential bias                                                                                                                                                                                                                                                    | 1   |
| Interpretation           | 20  | Give a cautious overall interpretation of results considering objectives, limitations, multiplicity of analyses, results from similar studies, and other relevant evidence                                                                                                                                                                                                                                    | 8   |
| Generalisability         | 21  | Discuss the generalisability (external validity) of the study results                                                                                                                                                                                                                                                                                                                                         | 8   |
| <b>Other information</b> |     |                                                                                                                                                                                                                                                                                                                                                                                                               |     |
| Funding                  | 22  | Give the source of funding and the role of the funders for the present study and, if applicable, for the original study on which the present article is based                                                                                                                                                                                                                                                 | 8   |

\*Give information separately for cases and controls in case-control studies and, if applicable, for exposed and unexposed groups in cohort and cross-sectional studies.

**Note:** An Explanation and Elaboration article discusses each checklist item and gives methodological background and published examples of transparent reporting. The STROBE checklist is best used in conjunction with this article (freely available on the Web sites of PLoS Medicine at <http://www.plosmedicine.org/>, Annals of Internal Medicine at <http://www.annals.org/>, and Epidemiology at <http://www.epidem.com/>). Information on the STROBE Initiative is available at [www.strobe-statement.org](http://www.strobe-statement.org).

# BMJ Open

## Glycaemic, blood pressure and low-density lipoprotein-cholesterol control among patients with diabetes mellitus in a specialised clinic in Botswana: a cross-sectional study

|                                 |                                                                                                                                                                                                                                                                                                                                                                                                                                                                                                                                                                                                                                                                                                                                                                                                                                                                                                                                                                                                                                                                                                                                  |
|---------------------------------|----------------------------------------------------------------------------------------------------------------------------------------------------------------------------------------------------------------------------------------------------------------------------------------------------------------------------------------------------------------------------------------------------------------------------------------------------------------------------------------------------------------------------------------------------------------------------------------------------------------------------------------------------------------------------------------------------------------------------------------------------------------------------------------------------------------------------------------------------------------------------------------------------------------------------------------------------------------------------------------------------------------------------------------------------------------------------------------------------------------------------------|
| Journal:                        | <i>BMJ Open</i>                                                                                                                                                                                                                                                                                                                                                                                                                                                                                                                                                                                                                                                                                                                                                                                                                                                                                                                                                                                                                                                                                                                  |
| Manuscript ID                   | bmjopen-2018-026807.R2                                                                                                                                                                                                                                                                                                                                                                                                                                                                                                                                                                                                                                                                                                                                                                                                                                                                                                                                                                                                                                                                                                           |
| Article Type:                   | Research                                                                                                                                                                                                                                                                                                                                                                                                                                                                                                                                                                                                                                                                                                                                                                                                                                                                                                                                                                                                                                                                                                                         |
| Date Submitted by the Author:   | 14-May-2019                                                                                                                                                                                                                                                                                                                                                                                                                                                                                                                                                                                                                                                                                                                                                                                                                                                                                                                                                                                                                                                                                                                      |
| Complete List of Authors:       | Mwita, Julius; University of Botswana, Internal medicine; Princess Marina Hospital, Internal Medicine<br>Francis, Joel; Wits Health Consortium Pty Ltd, Wits Reproductive Health & HIV Institute; Harvard University T H Chan School of Public Health, Global Health<br>Omech, Bernard; University of Botswana, Internal Medicine; Princess Marina Hospital, Internal Medicine<br>Botsile, Elizabeth; University of Botswana, Internal Medicine; Princess Marina Hospital, Internal Medicine<br>Oyewo, Aderonke ; Princess Marina Hospital, Internal Medicine<br>Mokgwathi, Matshidiso ; University of Botswana, Internal medicine; Princess Marina Hospital, Internal Medicine<br>Molefe-Baikai , Onkabetse ; University of Botswana, Internal medicine; Princess Marina Hospital, Internal Medicine<br>Godman, Brian; University of Liverpool, Health Economics; Karolinska Universitetssjukhuset, Laboratory Medicine, Division of Clinical Pharmacology<br>Tshikuka, Jose- Gaby; University of Botswana, Family Medicine and Public Health, Faculty of Medicine; National Pedagogical University, Faculty of Health Sciences |
| <b>Primary Subject Heading</b>: | Diabetes and endocrinology                                                                                                                                                                                                                                                                                                                                                                                                                                                                                                                                                                                                                                                                                                                                                                                                                                                                                                                                                                                                                                                                                                       |
| Secondary Subject Heading:      | Cardiovascular medicine                                                                                                                                                                                                                                                                                                                                                                                                                                                                                                                                                                                                                                                                                                                                                                                                                                                                                                                                                                                                                                                                                                          |
| Keywords:                       | Glycemic, Botswana, LDL, Hypertension < CARDIOLOGY, Diabetes Mellitus, control                                                                                                                                                                                                                                                                                                                                                                                                                                                                                                                                                                                                                                                                                                                                                                                                                                                                                                                                                                                                                                                   |
|                                 |                                                                                                                                                                                                                                                                                                                                                                                                                                                                                                                                                                                                                                                                                                                                                                                                                                                                                                                                                                                                                                                                                                                                  |

SCHOLARONE™  
Manuscripts

1  
2  
3 **Glycaemic, blood pressure and low-density lipoprotein-cholesterol control among patients with**  
4 **diabetes mellitus in a specialised clinic in Botswana: a cross-sectional study**

5  
6 Julius Chacha Mwita<sup>1,2\*</sup>, Joel Msafiri Francis<sup>3,4</sup>, Bernard Omech<sup>1,2</sup>, Elizabeth Botsile<sup>2</sup>, Aderonke Oyewo<sup>2</sup>,  
7 Matshidiso Mokgwathi<sup>1,2</sup>, Onkabetse Julia Molefe-Baikai<sup>1,2</sup>, Brian Godman<sup>5,6</sup>, Jose Gaby Tshikuka<sup>7,8</sup>

8  
9 **Authors' affiliations**

10 <sup>1</sup>Department of Internal Medicine, Faculty of Medicine, University of Botswana, Gaborone,  
11 Botswana

12 <sup>2</sup>Department of Internal Medicine, Princess Marina Hospital, Gaborone, Botswana

13 <sup>3</sup>Wits Health Consortium, Wits Reproductive Health & HIV Institute, Johannesburg, South  
14 Africa

15 <sup>4</sup> Department of Global Health, Harvard University T H Chan School of Public Health,  
16 Boston, MA, USA

17 <sup>5</sup>Department of Laboratory Medicine, Division of Clinical Pharmacology, Karolinska Institutet,  
18 Karolinska University Hospital Huddinge, Stockholm, Sweden

19 <sup>6</sup> Liverpool Health Economics, University of Liverpool, Liverpool, UK

20 <sup>7</sup>Department of Family Medicine and Public Health, Faculty of Medicine, University of  
21 Botswana, Gaborone, Botswana

22 <sup>8</sup>Faculty of Health Sciences, National Pedagogic, University, Kinshasa, the Democratic Republic  
23 of the Congo

24  
25  
26  
27  
28  
29 **Correspondence to**

30 **Dr Julius Chacha Mwita;**

31 The University of Botswana, Faculty of Medicine,

32 Private Bag 00713, Gaborone, Botswana

33 Phone: +26773078658

34 Email: [mwitajc@ub.ac.bw](mailto:mwitajc@ub.ac.bw)

## **Abstract**

**Objective:** Control of glycaemic, hypertension and low-density lipoprotein-cholesterol (LDL-C) among type 2 diabetes mellitus (T2DM) patients is vital for the prevention of cardiovascular diseases (CVD). The current study was an audit of glycaemic, hypertension, and LDL-C control among ambulant patients with type 2 diabetes mellitus in Botswana. Also, the study aimed at assessing factors associated with attaining optimal glycaemic, hypertension and LDL-C therapeutic goals.

**Design:** A cross-sectional study.

**Setting:** A specialised public diabetes clinic in Gaborone, Botswana.

**Participants:** Type 2 diabetes mellitus patients who had attended the clinic for  $\geq$  three months between August 2017 and February 2018.

**Primary outcome measure:** The proportion of patients with optimal glycaemic (HbA1c  $<7\%$ ), hypertension (blood pressure  $<140/90$ mmHg) and LDL-C ( $<1.8$ mmol/L) control.

**Results:** The proportions of patients meeting optimal targets were 32.3% for glycaemic, 54.2% for hypertension, and 20.4% for LDL-C. Optimal glycaemic control was positively associated with age  $\geq 50$  years (AOR 5.79; 95% CI 1.08 - 31.14) but was inversely associated with an increase in diabetes duration (AOR 0.91; 95%CI 0.85 - 0.98). Being on an angiotensin-converting-enzyme inhibitor (ACE inhibitor) was inversely associated with optimal hypertension control (AOR 0.35; 95% CI 0.14 - 0.85). Being female (AOR 0.24; 95% CI (0.09 - 0.59) was inversely associated with optimal LDL-C control.

**Conclusion:** Patients with Type 2 diabetes mellitus in Gaborone, Botswana, presented with suboptimal control of recommended glycaemic, hypertension and LDL-C targets. These findings call for urgent individual and health systems interventions to address key determinants of the recommended therapeutic targets among patients with diabetes in this setting.

**Keywords:** Glycaemic, hypertension, LDL-C, cholesterol, control Diabetes Mellitus, Botswana

**Strengths and limitations of this study**

- The first study to objectively assess the three critical therapeutic targets in patients with diabetes in Botswana.
- The study was undertaken in one specialised public diabetes clinic and the findings may not be generalised to other facilities in the country..
- The cross-sectional design limited the assessment of the temporal relationship between factors associated with poor control of glycaemia, LDL-C and hypertension.
- Systematic random sampling and incomplete data in some participants may not have yielded a representative sample of our clinic enrolees.



## **Introduction**

Diabetes mellitus and related cardiovascular complications are growing public health concerns worldwide<sup>1,2</sup>. There are approximately 16 million people with diabetes in Africa, and this number is projected to increase to 41 million by 2045 due to rapid urbanisation, lifestyles changes and nutrition transition in the continent<sup>1</sup>. This increase in prevalence and incidence of diabetes is attributable to type 2 diabetes, which is associated with multiple comorbidities such as obesity and hypertension requiring chronic care and catastrophic health expenditure<sup>1</sup>. Diabetes and associated comorbidities are known to increase patients' risk of developing cardiovascular diseases (CVD), which are responsible for approximately 70% of diabetes-related deaths<sup>3,4</sup>. The risk to the development of CVD is higher in people with suboptimal glycaemic, hypertension and LDL-C control<sup>3,5</sup>. A reduction of HbA1c to control targets along with optimal hypertension control and the use of statins to lower LDL-C levels have been shown to improve long-term outcomes including reducing mortality among patients with diabetes<sup>6-9</sup>. Achieving these targets remains a challenge in most settings, especially those with limited access to standard diabetes care<sup>10-16</sup>. Only a minority of patients with diabetes in Africa achieves optimal therapeutic targets, leaving the majority of patients at high risk of diabetes-related complications<sup>13,15</sup>. Suboptimal treatment to recommended targets is a public health concern because the current total health expenditure in most sub-Saharan African countries remains far below the 15% recommended in the Abuja declaration<sup>17</sup>. The rising cost of managing diabetes complications will further make health system goals unattainable<sup>1</sup>. Thus, this study was an audit of glycaemic, hypertension, and LDL-C control among ambulant patients with type 2 diabetes mellitus in Botswana. The study also assessed factors associated with the attainment of glycaemic, blood pressure and LDL-C therapeutic targets in these patients.

## **Methods**

### **Study design and participants**

We conducted a cross-sectional study of outpatients with established type 2 diabetes attending a specialised public diabetes clinic in Gaborone, Botswana between August 2017 and February 2018. The clinic has been operational since 2011 as a referral centre for health facilities in Gaborone and nearby towns. Eligible patients were those aged  $\geq 18$  years and had received care from the clinic for at least three months. We needed a sample size of 500 to produce a two-sided 95% confidence interval with a width equal to 3.86% based on the assumptions of approximately 26.2% glycaemic control among patients with type 2 diabetes in Botswana<sup>16</sup>. Systematic random sampling was used to select patients from a list of patients who attended the clinic every day. In a recruitment day, we randomly picked the first patient from the list of the first eight clinic attendees. Subsequently, we enrolled every eighth individual until either the daily target of 10 patients was reached or the clinic came to an end. As there was a daily variation of

1  
2  
3 the number of clinic attendees, the number of our daily enrolments varied as well. Participants provided  
4 informed consent before enrolment. The Ministry of Health (HPDME: 13/18/1 VOL XI) and Princess  
5 Marina Hospital (PMH 5/79,317-1-2017) Institutional Review Boards granted ethical approval for the  
6 study.  
7  
8  
9

### 10 **Data collection and procedures**

11 Patient information was collected using an interviewer-administered questionnaire and through reviews of  
12 medical charts and electronic records. The information included: demographic data (age, gender,  
13 occupation, marital status, and education), diabetes duration, history of hypertension, and medications for  
14 diabetes, hypertension and lipid disorders. We performed anthropometry (weight, height, waist and hip  
15 circumferences) and blood pressure measurements at enrolment. We conducted three blood pressure  
16 measurements after 10 minutes of rest, and the mean of the three measurements was recorded<sup>18</sup>. Moreover,  
17 we documented blood pressure readings from each patient's previous visit. Patients' serum creatinine, LDL-  
18 C and HbA1c, and urine dipstick for proteinuria results over the past six months were abstracted from the  
19 electronic medical records.  
20  
21  
22  
23  
24  
25

### 26 **Definitions of the key outcomes and exposure variables**

27 We calculated the diabetes duration as the date of enrolment into the study minus the date of a diabetes  
28 diagnosis. A patient was considered hypertensive by self-reported hypertension and the use of blood  
29 pressure-lowering medications or had sustained blood pressure  $\geq 140/90$  mmHg during the previous visit  
30 and at enrolment<sup>19-21</sup>. Optimal glycaemic control was defined as HbA1c  $< 7\%$ <sup>19 21</sup>. For patients who were  
31 on lipid-lowering medications, optimal LDL-C control was LDL cholesterol level  $< 1.8$  mmol/L<sup>19</sup>. We  
32 calculated patients' eGFR by the Modification of Diet in Renal Disease (MDRD) formula, and an eGFR  
33  $< 60.0$  mL/min/1.73m<sup>2</sup> defined Chronic Kidney Disease (CKD)<sup>22 23</sup>. Body mass index (BMI) was  
34 calculated as weight in kilograms divided by the square of height in meters. We considered underweight as  
35 BMI  $< 18.5$  kg/m<sup>2</sup>, normal weight as BMI of 18.5-24.9 kg/m<sup>2</sup>, overweight as BMI of 25. -29.9 kg/m<sup>2</sup>, and  
36 obesity as BMI  $\geq 30$  kg/m<sup>2</sup><sup>24</sup>. Waist-hip ratio (WHR) was calculated as waist circumference (WC) in  
37 centimetres divided by hip circumference (HC) in centimetres and classified as high when WHR was  $\geq 0.85$   
38 and  $\geq 0.90$  for women and men respectively<sup>24</sup>.  
39  
40  
41  
42  
43  
44  
45  
46  
47

### 48 **Patient and Public Involvement**

49 We did not directly involve patients in the design, recruitment to and conduct of the study. However, the  
50 development of the research question and outcome measures were informed by patients' priorities,  
51 experience, and preferences. These were realised during the regular diabetes support group meetings where  
52 the authors of this study interact with patients and their families. Investigators working at the clinic will  
53  
54  
55  
56  
57

1  
2  
3 discuss the study findings with colleagues and provide them with critical results for sharing with patients  
4 (study participants). In close collaboration with the patient support group, the investigation team will  
5 summarise the results in plain language for a large poster and place it in a waiting room.  
6  
7

### 8 **Statistical analysis**

9  
10 We performed analyses using Stata, Version 14 (Stata Corp, College Station, TX). We used percentages to  
11 summarise categorical variables. Means and standard deviation (SD) or medians and interquartile range  
12 (IQR) were used to summarise continuous variables. Pearson's  $\chi^2$  or Fisher's exact tests were used to  
13 assessing statistical differences by gender for the categorical variables, while the Student's t-test or the  
14 Mann-Whitney U test were used for the continuous ones. Bivariate logistic regression was used to explore  
15 factors associated with each primary outcome - glycaemic, hypertension and LDL-C control. We further  
16 performed three multivariate logistic regression models for each of the three outcomes. The independent  
17 variables selected for multivariate models were those displaying a p-value  $< 0.2$  at the univariate analysis  
18 level in addition to those considered clinically meaningful (age and gender). We described results as crude  
19 odds ratio (OR), adjusted odds ratio (AOR), and their corresponding 95% confidence intervals (95% CI).  
20 We used the Hosmer-Lemeshow goodness-of-fit test to assess how well the data fit the model <sup>25</sup>.  
21 A 2-tailed p-value  $< 0.05$  was considered statistically significant.  
22  
23  
24  
25  
26  
27  
28  
29

### 30 **Results**

31 The response rate was 97%, as only 17 (3.4%) of the approached participants declined participation because  
32 of time constraints. We included 500 patients with type 2 diabetes in the study, of which 330 (66%) were  
33 females. The mean (SD) age was 58.9 (12.2) years, and 78.2% were aged  $> 50$  years. The median (IQR)  
34 diabetes duration was 6 (2 - 13) years. There was a high percentage of patients with hypertension (80.8%),  
35 overweight (31.1%) and obesity (50.2%). Table 1 summarises the patients' characteristics by gender.  
36 Female patients tended to be older (60.8 vs 55.4 years,  $p < 0.001$ , obese (56.7% vs 37.1%,  $p < 0.001$ ), have  
37 higher WHR (95.2% vs 55.9%), be hypertensive (86.1% vs 70.6%,  $p < 0.001$ ), and have a higher mean total  
38 cholesterol (4.5mmol/L vs 4.3mmol/L,  $p = 0.030$ ) and LDL-C (2.9 mmol/L vs 2.6 mmol/L,  $p = 0.006$ ) than  
39 male patients. Urine dipstick was positive for protein in 10.2% of patients, mostly males (15.9% vs 7.3%,  
40  $p = 0.003$ ).  
41  
42  
43  
44  
45  
46  
47  
48

49 **[Table 1: Clinical and socio-demographic characteristics of patients with type 2 diabetes at a**  
50 **specialised Diabetes clinic in Gaborone (N= 500)]**  
51

### 52 **Optimal glycaemic control**

53  
54  
55  
56  
57

1  
2  
3 The mean (SD) HbA1c was 8.4 % (2.4) overall, 8.6% (2.7) for female and 8.0% (1.6) for male patients  
4 (p=0.199) [Table 1]. The proportion of the patients receiving oral hypoglycaemic agents alone was 54.2%;  
5 30% were on oral hypoglycaemic agents combined with insulin; 13.6% on insulin alone and 2.2% were on  
6 a diet alone. Of the 218 patients on insulin, 184 (84.4%) were on premix insulin. Of the 421 patients on oral  
7 hypoglycaemic agents, 411(97.6%) patients were on metformin, and 194 (46.1%) patients were on a  
8 sulphonylurea. Compared to patients on other anti-diabetic medications, those on insulin injections were  
9 more likely to be males. We noted optimal glycaemic control in 159 (32.3%) patients, whose mean) HbA1c  
10 was 6.1 %. Age over 50 years was associated with optimal glycaemic control (AOR 5.79; 95%CI 1.08 -  
11 31.14). On the other hand, an increase in diabetes duration was inversely associated with optimal glycaemic  
12 control (AOR 0.91; 95%CI 0.85 - 0.98). There was no association between gender, anthropometry, diabetes  
13 medications or education on the level of glycaemic control [Table 2].  
14  
15  
16  
17  
18  
19  
20  
21

22 **[Table 2: Factors associated with optimal glycaemic control among patients with type 2 diabetes at**  
23 **a specialised diabetes clinic in Gaborone (N= 500)]**  
24  
25  
26

27 **Optimal hypertension control**

28 There were 404 (80.8%) hypertensive patients [Table 1]. Age  $\geq$  50 years (AOR 4.95; 95%CI 2.81-  
29 8.73), increased WHR (AOR 3.87; 95%CI 1.72 - 8.71), eGFR (AOR 0.98; 95% CI 0.97 - 0.99),  
30 and a long diabetes duration (AOR= 1.07, 95% CI 1.02 - 1.12) were associated with hypertension.  
31 Seventeen (4.2%) hypertensive patients did not receive any antihypertensive medication. Of the  
32 389 patients who received antihypertensive medications, 219 (56.3%) received calcium channel  
33 blockers, 189 (48.6%) were treated with thiazides diuretics, 183(47.0%) with angiotensin-  
34 converting-enzyme inhibitors (ACE inhibitors), and 74(19.0%) with Angiotensin II receptor  
35 blockers (ARBs). The proportions of patients receiving  $\beta$ - and  $\alpha$ -blockers were 22.4% and 5.4%  
36 respectively.  
37  
38

39 Of the 389 patients who received antihypertensive medicines, optimal hypertension control was  
40 noted in 211 (54.2%) patients. Patients on ACE inhibitors were less likely to attain optimal  
41 hypertension control compared to those who were not on ACE inhibitors (AOR 0.24; 95% CI (0.09  
42 - 0.59). There was no association between gender, anthropometry, or education on the level of  
43 hypertension control [Table 3].  
44  
45  
46  
47  
48  
49  
50  
51  
52

53 **[Table 3: Factors associated with optimal hypertension control among patients with type 2 diabetes**  
54 **at a specialised diabetes clinic in Gaborone (N= 500)]**  
55  
56  
57

### Optimal LDL-C control

A total of 225 (45%) patients were receiving lipid-lowering drugs, mostly (96.4%) atorvastatin. Of these, 147 (65.3%) patients had LDL-C measurements available. Only 30 (20.4%) achieved the optimal LDL-C control target. Females were less likely to achieve optimal LDL-C control as compared to males, (0.24; 95% CI (0.09 - 0.59). There was no association of age, anthropometry, or education on the level of LDL-C control [Table 4].

**[Table 4: Factors associated with optimal LDL-C control among patients with type 2 diabetes at a specialised diabetes clinic in Gaborone (N= 500)]**

### Discussion

This outpatient cross-sectional study showed a low proportion of patients with optimal control of glycaemic, hypertension, and LDL-C among Type 2 patients attending a diabetes clinic in Botswana. In the multivariate analysis, duration of diabetes and age above 50 years were significantly associated with optimal glycaemic control. Being on ACE inhibitors was inversely related to optimal hypertension control. Females were less likely to attain optimal LDL-C levels than males.

Only 32.3% of our participants achieved optimal glycaemic control. Similarly, low levels of glycaemic control have also been seen among patients with diabetes in Africa<sup>11 13 26 27</sup>. The proportion of patients with optimal glycaemic control (HbA1c < 6.5%) in specialised diabetes care centres across six sub-Saharan African countries was reported to be 29%<sup>13</sup>. Similarly, only 7-31% of patients attained optimal glycaemic control (HbA1c level < 7%) in other settings in Africa<sup>12 14 27</sup>. Consequently, suboptimal glycaemic levels are an apparent concern not only in Botswana but also in other African countries. In most studies, the majority of the patients have HbA1c > 8%, well above the recommended target (<7%) required to avoid the development of microvascular and macrovascular complications<sup>12 13</sup>. This suboptimal glycaemic control could explain the four and tenfold prevalence of sight-threatening diabetic retinopathy and proliferative retinopathy respectively found among African populations compared to their European counterparts<sup>28</sup>. Despite poor glycaemic control level, only a few of our patients were on insulin, suggesting clinical inertia of our clinicians in response to low glycaemic control<sup>29</sup>. We will be investigating this further given concerns with the lack of glycaemic control in our patients. Similar to other studies in Sub-Saharan Africa, the likelihood of attaining optimal glycaemic control decreased as the duration of diabetes increased<sup>30</sup>. There is evidence of a progressive loss of beta-cell function with increasing diabetes duration<sup>7</sup>. Insulin production progressively declines over time, leading to suboptimal glycaemic control unless higher dosages or additional agents are initiated<sup>7</sup>. Comparable to reports from other studies, older patients in our study were more likely to achieve optimal glycaemic control than young ones<sup>31 32</sup>. It is possible that young patients are less likely to be compliant with medication and lifestyle modification as

1  
2  
3 compared to their older counterparts. However, again we need to research this further before making any  
4 concrete statements and instigating pertinent quality improvement programmes.

5  
6 We also found a high prevalence (80.8%) of hypertension among patients attending our specialised diabetes  
7 clinic. A decade ago, the prevalence of hypertension among patients with diabetes in this setting was 61.2%  
8 <sup>33</sup>. Our findings may suggest an increasing burden of hypertension as seen globally, but also a reflection of  
9 the improvement in the screening and diagnosis of hypertension over the past few years<sup>34</sup>. We are aware  
10 of the comparable high frequencies of hypertension in other African studies <sup>13</sup>. Consistent with previous  
11 studies, patients with hypertension were older, more obese, and had declining GFR and longer diabetes  
12 duration<sup>11 35</sup>. Thiazide diuretics, calcium channel blockers and ACE inhibitors were the three most  
13 prescribed antihypertensive agents. This finding is in line with the available evidence recommending  
14 thiazide diuretics and calcium channels blockers as the most effective antihypertensives in the black  
15 population <sup>19 20 35</sup>. Optimal hypertension control was observed in only 54.2% of the patients on  
16 antihypertensives, suggesting an urgent need for initiatives to improve the identification and control of  
17 hypertension. This low control level is a concern given the increased mortality if hypertension is not  
18 controlled<sup>6</sup>. Having said this, the proportion of patients with optimal hypertension control in our population  
19 was superior to several studies in Africa, notwithstanding the variation of the definitions of optimal  
20 hypertension control across these studies <sup>11-14 35-37</sup>. The proportion of type 2 diabetes with optimal  
21 hypertension in Africa is often below 35%<sup>11 12 37</sup>.

22  
23 However, there is no room for complacency. In the present study, the use of ACE inhibitors was inversely  
24 associated with optimal hypertension control. Although ACE inhibitors are indicated for patients with  
25 diabetes and proteinuria, they have a clinically significant lesser reduction in both systolic and diastolic  
26 blood pressure in the black population. This could partly explain suboptimal hypertension control among  
27 predominantly black patients in our study. There appeared to be no influence of gender on hypertension  
28 control similar to other studies<sup>38</sup>, which is encouraging as a recent systematic review found that males in  
29 low and middle income countries (LMICs) are more likely to be non-adherent to their medications <sup>39 40</sup>.

30  
31 Less than half of the patients (45%) were on lipid-lowering drugs, mostly statins. This is not surprising as  
32 the prescription of lipid-lowering medications in Africa is as low as 3 - 13% in patients with diabetes due  
33 to the limited access to these drugs as well as lack of facilities for monitoring lipid profiles while patients  
34 are on treatment, regular medication stock outs, and insufficient health professionals <sup>13 40 41</sup>. It is, however,  
35 a concern as the reduced use of statins will increase mortality rates in patients with diabetes<sup>8</sup>. In some  
36 countries, the issue of co-payments limits the prescription of expensive medications like statins<sup>42</sup>. However,  
37 this is not an issue in Botswana where medications are provided free of charge to patients. Although the  
38 lack of co-payments might have led to a higher prescription of statins in Botswana than in other African  
39 countries, we would expect the rate of statin prescriptions to mirror the high rates seen in Western  
40  
41  
42  
43  
44  
45  
46  
47  
48  
49  
50  
51  
52  
53  
54  
55  
56  
57

1  
2  
3 countries<sup>43</sup>. Education and adherence to guidelines will possibly improve the prescription and use of statins  
4 among the majority of patients with diabetes according to treatment guidelines<sup>19 21</sup>. Even when statins were  
5 used, an undesirably small proportion of our patients achieved guideline-recommended LDL-C target level.  
6 Suboptimal LDL-C control rates are also frequent across different settings, even in developed countries<sup>9 13</sup>  
7  
8  
9  
10  
11  
12  
13  
14  
15  
16  
17  
18  
19  
20  
21  
22  
23  
24  
25  
26  
27  
28  
29  
30  
31  
32  
33  
34  
35  
36  
37  
38  
39  
40  
41  
42  
43  
44  
45  
46  
47  
48  
49  
50  
51  
52  
53  
54  
55  
56  
57  
58  
59  
60  
15<sup>44</sup>. This is disappointing as achieving LDL-C reduction is associated with the highest cardiovascular risk  
reduction than hypertension and HbA1c reduction<sup>9</sup>. Inadequate patients' adherence and possibly clinicians'  
under-dosage of statin for fear of potential side effects are some of the factors that possibly explain  
suboptimal LDL-C control in our patients<sup>9</sup>. Besides, clinicians may be unaware of the current LDL-C as  
well as those of HbA1c and hypertension therapeutic goals<sup>19 21</sup>. Irrespective of the reason, there is an urgent  
need to instigate measures to meet guideline-recommended therapeutic goals, and we have started to  
address this in our clinic. As reported in other studies, women were less likely than men to achieve optimal  
LDL-C control<sup>44</sup>. Although the reason for this gender difference is not apparent, this information is  
significant for clinicians to pay attention to the management of women with diabetes in Botswana and other  
African countries.

To the best of our knowledge this first study to objectively assess the three critical therapeutic targets in  
patients with diabetes in one of the few specialised diabetes clinics in Botswana. However, our findings  
should be interpreted considering several limitations. First, the study was limited to one specialised public  
diabetes clinic, and the findings may not be generalised to other public and private facilities in the country.  
Nevertheless, being the leading specialised diabetes clinics in the country, our findings likely represent the  
'best' quality of diabetes care in Botswana. Consequently, highlighted concerns are likely to be higher in  
non-specialist healthcare facilities treating patients with type 2 diabetes in Botswana. Second, the study was  
cross-sectional in design and therefore unable to establish a temporal relationship between the factors  
associated with poor control of glycaemia, LDL-C and hypertension. Third, the results may be subject to  
selection bias because of incomplete data in some participants. Another potential risk of selection bias is  
the fact that the study enrolled only those patients available at the clinic during the study period. As such,  
patients unable to attend the clinic or those whose appointments did not coincide with the study period did  
not participate. Despite these limitations, we believe our findings are robust to help improve the care of patients  
with type 2 diabetes in Botswana.

In conclusion, there was suboptimal glycaemic, hypertension and LDL-C control among patients with  
diabetes in our setting. These findings call for urgent individual and health systems interventions to address  
the factors associated with suboptimal control of the cardiovascular risk factors among patients with type 2  
diabetes in Botswana. This will be the subject of future initiatives and research in our clinic given the  
growing prevalence of patients with type 2 diabetes in Botswana.

### **Funding**

1  
2  
3 This research received no specific grant from any funding agency in public, commercial or not-for-profit  
4 sectors.  
5

### 6 **Competing Interests statement**

7  
8 None disclosed  
9

### 10 **Acknowledgements**

11 We sincerely thank sister Lasty Mbulawa and Dr Sweta Jammalamadugu for their assistance in data  
12 collection. Also, we appreciate the other staff at the diabetes clinic for their help and the participants for  
13 their time and patience to be part of the study.  
14  
15

### 16 **Author contributions**

17 JCM was involved in the conception of the study, data analysis, drafting and revising the manuscript. BO  
18 was involved in the design of the study and critical revision of the manuscript. AO, MM participated in the  
19 design of the study, data collection and critical revision of the manuscript. JMF participated in data analysis  
20 and manuscript review. EB performed data entry and management, and critical revision of the manuscript.  
21 OJM, BG, and JGT were involved in the interpretation of the data and manuscript revision. All the authors  
22 granted final approval of the version to be published; and agreed to be accountable for all aspects of the  
23 work in ensuring that questions related to the accuracy or integrity of any part of the work are appropriately  
24 investigated and resolved.  
25  
26  
27  
28  
29  
30  
31

### 32 **Data sharing statement**

33 The dataset analysed during the current study is available from the corresponding author on reasonable  
34 request, through the Princess Marina Hospital and Ministry of Health of Botswana ethical approval.  
35  
36

### 37 **References**

- 38  
39 1. International Diabetes Federation. IDF Diabetes Atlas, 8th edition. 2017.  
40 <http://www.diabetesatlas.org> (accessed July 24, 2018).  
41 2. World Health Organization. Global report on diabetes. 2016.  
42 [http://apps.who.int/iris/bitstream/handle/10665/204871/9789241565257\\_eng.pdf;jsessio](http://apps.who.int/iris/bitstream/handle/10665/204871/9789241565257_eng.pdf;jsessionid=7534319F5DD126A2E538996187D64045?sequence=1)  
43 [nid=7534319F5DD126A2E538996187D64045?sequence=1](http://apps.who.int/iris/bitstream/handle/10665/204871/9789241565257_eng.pdf;jsessionid=7534319F5DD126A2E538996187D64045?sequence=1) (accessed August 2, 2018).  
44 3. Low Wang CC, Hess CN, Hiatt WR, et al. Clinical Update: Cardiovascular Disease in Diabetes  
45 Mellitus: Atherosclerotic Cardiovascular Disease and Heart Failure in Type 2 Diabetes  
46 Mellitus - Mechanisms, Management, and Clinical Considerations. *Circulation*  
47 2016;133(24):2459-502. doi: <https://doi.org/10.1161/CIRCULATIONAHA.116.022194>  
48 [published Online First: 2016/06/15]  
49 4. Mwita JC, Magafu M, Omech B, et al. Undiagnosed and diagnosed diabetes mellitus among  
50 hospitalised acute heart failure patients in Botswana. *SAGE open medicine*  
51 2017;5:2050312117731473. doi: <https://doi.org/10.1177/2050312117731473> [published  
52 Online First: 2017/09/22]  
53  
54  
55  
56  
57  
58  
59  
60



- 1
  - 2
  - 3
  - 4
  - 5
  - 6
  - 7
  - 8
  - 9
  - 10
  - 11
  - 12
  - 13
  - 14
  - 15
  - 16
  - 17
  - 18
  - 19
  - 20
  - 21
  - 22
  - 23
  - 24
  - 25
  - 26
  - 27
  - 28
  - 29
  - 30
  - 31
  - 32
  - 33
  - 34
  - 35
  - 36
  - 37
  - 38
  - 39
  - 40
  - 41
  - 42
  - 43
  - 44
  - 45
  - 46
  - 47
  - 48
  - 49
  - 50
  - 51
  - 52
  - 53
  - 54
  - 55
  - 56
  - 57
  - 58
  - 59
  - 60
5. Marks JB, Raskin P. Cardiovascular risk in diabetes: a brief review. *Journal of diabetes and its complications* 2000;14(2):108-15. doi: [https://doi.org/10.1016/S1056-8727\(00\)00065-9](https://doi.org/10.1016/S1056-8727(00)00065-9) [published Online First: 2000/08/26]
6. U.K Prospective Diabetes Study Group. Tight blood pressure control and risk of macrovascular and microvascular complications in type 2 diabetes: UKPDS 38. *BMJ (Clinical research ed)* 1998;317(7160):703-13. doi: <https://doi.org/10.1136/bmj.317.7160.703> [published Online First: 1998/09/11]
7. U.K. Prospective Diabetes Study Group. Overview of 6 years' therapy of type II diabetes: a progressive disease: UKPDS 16. *Diabetes* 1995;44(11):1249-58. doi: <https://doi.org/10.2337/diab.44.11.1249> [published Online First: 1995/11/01]
8. Collins R, Armitage J, Parish S, et al. MRC/BHF Heart Protection Study of cholesterol-lowering with simvastatin in 5963 people with diabetes: a randomised placebo-controlled trial. *Lancet (London, England)* 2003;361(9374):2005-16. doi: [https://doi.org/10.1016/S0140-6736\(03\)13636-7](https://doi.org/10.1016/S0140-6736(03)13636-7) [published Online First: 2003/06/20]
9. Wan EYF, Fung CSC, Yu EYT, et al. Effect of Multifactorial Treatment Targets and Relative Importance of Hemoglobin A1c, Blood Pressure, and Low-Density Lipoprotein-Cholesterol on Cardiovascular Diseases in Chinese Primary Care Patients With Type 2 Diabetes Mellitus: A Population-Based Retrospective Cohort Study. *Journal of the American Heart Association* 2017;6(8):e006400. doi: <https://doi.org/10.1161/JAHA.117.006400>
10. Saydah SH, Fradkin J, Cowie CC. Poor control of risk factors for vascular disease among adults with previously diagnosed diabetes. *Jama* 2004;291(3):335-42. doi: <https://doi.org/10.1001/jama.291.3.335> [published Online First: 2004/01/22]
11. Mwita JC, Mugusi F, Lwakatare J, et al. Hypertension control and other cardiovascular risk factors among diabetic patients at Muhimbili National Hospital, Tanzania. *East Afr J Public Health* 2012;9(2):70-3. [published Online First: 2012/11/13]
12. Klisiewicz A, Raal F. Sub-optimal management of type 2 diabetes mellitus—a local audit. *Journal of Endocrinology, Metabolism and Diabetes of South Africa* 2009;14(1):13-16. doi: <https://doi.org/10.1080/22201009.2009.10872186>
13. Sobngwi E, Ndour-Mbaye M, Boateng KA, et al. Type 2 diabetes control and complications in specialised diabetes care centres of six sub-Saharan African countries: the Diabcare Africa study. *Diabetes research and clinical practice* 2012;95(1):30-36. doi: <https://doi.org/10.1016/j.diabres.2011.10.018> [published Online First: 2011/11/11]
14. Kibirige D, Atuhe D, Sebunya R, et al. Suboptimal glycaemic and blood pressure control and screening for diabetic complications in adult ambulatory diabetic patients in Uganda: a retrospective study from a developing country. *Journal of Diabetes & Metabolic Disorders* 2014;13(1):40. doi: <https://doi.org/10.1186/2251-6581-13-40>
15. Pinchevsky Y, Butkow N, Chirwa T, et al. Glycaemic, blood pressure and cholesterol control in 25 629 diabetics. *Cardiovascular journal of Africa* 2015;26(4):188-92. doi: <http://dx.doi.org/10.5830/cvja-2015-050> [published Online First: 2015/09/26]
16. Pinchevsky Y, Butkow W, Raal FJ, et al. The implementation of guidelines in a South African population with type 2 diabetes. *Journal of Endocrinology, Metabolism and Diabetes of South Africa* 2013;18(3):154-58. doi: <https://doi.org/10.1080/22201009.2013.10844554>
17. World Health Organization. The Abuja declaration: ten years on. 2011. 2016. [http://www.who.int/healthsystems/publications/abuja\\_report\\_aug\\_2011.pdf?ua=1](http://www.who.int/healthsystems/publications/abuja_report_aug_2011.pdf?ua=1) (accessed August 25, 2018).

18. Chobanian AV, Bakris GL, Black HR, et al. The Seventh Report of the Joint National Committee on Prevention, Detection, Evaluation, and Treatment of High Blood Pressure: the JNC 7 report. *Jama* 2003;289(19):2560-72. doi: <https://doi.org/10.1001/jama.289.19.2560> [published Online First: 2003/05/16]
19. SEMDSA Type 2 Diabetes Guidelines Expert Committee. SEMDSA 2017 guidelines for the management of type 2 diabetes mellitus. *J Endocr Metab Diabetes S Afr* 2017;22(1 Suppl 1):S1-S196.
20. James PA, Oparil S, Carter BL, et al. 2014 evidence-based guideline for the management of high blood pressure in adults: Report from the panel members appointed to the eighth joint national committee (JNC 8). *Jama* 2014;311(5):507-20. doi: <https://doi.org/10.1001/jama.2013.284427> [published Online First: 2013/12/20]
21. American Diabetes Association. Standards of Medical Care in Diabetes-2017 Abridged for Primary Care Providers. *Clinical diabetes: a publication of the American Diabetes Association* 2017;35(1):5-26. doi: <https://doi.org/10.2337/cd16-0067> [published Online First: 2017/02/02]
22. Work Group and Evidence Review Team Membership. K/DOQI clinical practice guidelines for chronic kidney disease: evaluation, classification, and stratification. *American journal of kidney diseases: the official journal of the National Kidney Foundation* 2002;39(2 Suppl 1):S1-266. doi: [https://doi.org/10.1016/S0272-6386\(02\)70084-X](https://doi.org/10.1016/S0272-6386(02)70084-X) [published Online First: 2002/03/21]
23. Levey AS, Greene T, Schluchter MD, et al. Glomerular filtration rate measurements in clinical trials. Modification of Diet in Renal Disease Study Group and the Diabetes Control and Complications Trial Research Group. *Journal of the American Society of Nephrology: JASN* 1993;4(5):1159-71. [published Online First: 1993/11/01]
24. World Health Organization. Waist circumference and waist-hip ratio: report of a WHO expert consultation, Geneva, 8-11 December 2008. 2011. <http://www.who.int/iris/handle/10665/44583> (accessed 27/08/2018).
25. Hosmer DW, Hosmer T, Le Cessie S, et al. A comparison of goodness-of-fit tests for the logistic regression model. *Statistics in medicine* 1997;16(9):965-80. [published Online First: 1997/05/15]
26. Adeniyi OV, Yogeswaran P, Longo-Mbenza B, et al. Cross-sectional study of patients with type 2 diabetes in OR Tambo district, South Africa. *BMJ open* 2016;6(7):e010875. doi: <http://dx.doi.org/10.1136/bmjopen-2015-010875> [published Online First: 2016/07/31]
27. Erasmus RT, Blanco Blanco E, Okesina AB, et al. Assessment of glycaemic control in stable type 2 black South African diabetics attending a peri-urban clinic. *Postgraduate medical journal* 1999;75(888):603-6. doi: <http://dx.doi.org/10.1136/pgmj.75.888.603> [published Online First: 2000/01/06]
28. Burgess PI, Allain TJ, García-Fiñana M, et al. High prevalence in Malawi of sight-threatening retinopathy and visual impairment caused by diabetes: identification of population-specific targets for intervention. *Diabetic Medicine* 2014;31(12):1643-50. doi: <http://dx.doi.org/10.1111/dme.12492>
29. Shah BR, Hux JE, Laupacis A, et al. Clinical inertia in response to inadequate glycemic control: do specialists differ from primary care physicians? *Diabetes care* 2005;28(3):600-6. doi: <http://dx.doi.org/10.2337/diacare.28.3.600> [published Online First: 2005/03/01]

- 1  
2  
3 30. Camara A, Balde NM, Sobngwi-Tambekou J, et al. Poor glycaemic control in type 2 diabetes  
4 in the South of the Sahara: the issue of limited access to an HbA1c test. *Diabetes Res Clin*  
5 *Pract* 2015;108(1):187-92. doi: <https://doi.org/10.1016/j.diabres.2014.08.025> [published  
6 Online First: 2015/02/24]
- 7  
8 31. El-Kebbi IM, Cook CB, Ziemer DC, et al. Association of younger age with poor glycaemic  
9 control and obesity in urban African Americans with type 2 diabetes. *Archives of internal*  
10 *medicine* 2003;163(1):69-75. doi: <https://doi.org/10.1001/archinte.163.1.69> [published  
11 Online First: 2003/01/14]
- 12  
13 32. Fox KM, Gerber Pharmd RA, Bolinder B, et al. Prevalence of inadequate glycaemic control  
14 among patients with type 2 diabetes in the United Kingdom general practice research  
15 database: A series of retrospective analyses of data from 1998 through 2002. *Clinical*  
16 *therapeutics* 2006;28(3):388-95. doi: <https://doi.org/10.1016/j.clinthera.2006.03.005>  
17 [published Online First: 2006/06/06]
- 18  
19 33. Mengesha AY. Hypertension and related risk factors in type 2 diabetes mellitus (DM) patients  
20 in Gaborone City Council (GCC) clinics, Gaborone, Botswana. *African health sciences*  
21 2008;7(4)
- 22  
23 34. Forouzanfar MH, Liu P, Roth GA, et al. Global Burden of Hypertension and Systolic Blood  
24 Pressure of at Least 110 to 115 mm Hg, 1990-2015. *Jama* 2017;317(2):165-82. doi:  
25 <https://doi.org/10.1001/jama.2016.19043> [published Online First: 2017/01/18]
- 26  
27 35. Choukem SP, Kengne AP, Dehayem YM, et al. Hypertension in people with diabetes in sub-  
28 Saharan Africa: revealing the hidden face of the iceberg. *Diabetes Res Clin Pract*  
29 2007;77(2):293-9. doi: <http://dx.doi.org/10.1016/j.diabres.2006.11.007> [published Online  
30 First: 2006/12/23]
- 31  
32 36. Adeniyi OV, Yogeswaran P, Longo-Mbenza B, et al. Uncontrolled Hypertension and Its  
33 Determinants in Patients with Concomitant Type 2 Diabetes Mellitus (T2DM) in Rural  
34 South Africa. *PloS one* 2016;11(3):e0150033. doi:  
35 <http://dx.doi.org/10.1371/journal.pone.0150033> [published Online First: 2016/03/02]
- 36  
37 37. Webb EM, Rheeder P, Van Zyl DG. Diabetes care and complications in primary care in the  
38 Tshwane district of South Africa. *Primary care diabetes* 2015;9(2):147-54. doi:  
39 <https://doi.org/10.1016/j.pcd.2014.05.002> [published Online First: 2014/06/17]
- 40  
41 38. Nashilongo MM, Singu B, Kalemeera F, et al. Assessing Adherence to Antihypertensive  
42 Therapy in Primary Health Care in Namibia: Findings and Implications. *Cardiovascular*  
43 *drugs and therapy* 2017;31(5-6):565-78. doi: <https://doi.org/10.1007/s10557-017-6756-8>.  
44 [published Online First: 2017/10/17]
- 45  
46 39. Nielsen JO, Shrestha AD, Neupane D, et al. Non-adherence to anti-hypertensive medication  
47 in low- and middle-income countries: a systematic review and meta-analysis of 92443  
48 subjects. *Journal of human hypertension* 2017;31(1):14-21. doi:  
49 <https://doi.org/10.1038/jhh.2016.31> [published Online First: 2016/06/17]
- 50  
51 40. Gudina EK, Amade ST, Tesfamichael FA, et al. Assessment of quality of care given to  
52 diabetic patients at Jimma University Specialized Hospital diabetes follow-up clinic,  
53 Jimma, Ethiopia. *BMC endocrine disorders* 2011;11:19. doi:  
54 <http://dx.doi.org/10.1186/1472-6823-11-19> [published Online First: 2011/12/22]
- 55  
56 41. Uloko AE, Ofoegbu EN, Chinenye S, et al. Profile of Nigerians with diabetes mellitus -  
57 Diabcare Nigeria study group (2008): Results of a multicenter study. *Indian journal of*  
58 *endocrinology and metabolism* 2012;16(4):558-64. doi: [https://doi.org/10.4103/2230-  
59 8210.98011](https://doi.org/10.4103/2230-8210.98011) [published Online First: 2012/07/28]

- 1  
2  
3 42. Simoens S, Sinnaeve PR. Patient co-payment and adherence to statins: a review and case  
4 studies. *Cardiovascular drugs and therapy* 2014;28(1):99-109. doi:  
5 <http://dx.doi.org/10.1007/s10557-013-6497-2> [published Online First: 2013/10/24]  
6  
7 43. Pokharel Y, Akeroyd JM, Ramsey DJ, et al. Statin Use and Its Facility-Level Variation in  
8 Patients With Diabetes: Insight From the Veterans Affairs National Database. *Clinical*  
9 *cardiology* 2016;39(4):185-91. doi: <http://dx.doi.org/10.1002/clc.22503> [published  
10 Online First: 2016/04/10]  
11  
12 44. Pinchevsky Y, Shukla V, Butkow N, et al. The achievement of glycaemic, blood pressure and  
13 LDL cholesterol targets in patients with type 2 diabetes attending a South African tertiary  
14 hospital outpatient clinic. *Journal of Endocrinology, Metabolism and Diabetes of South*  
15 *Africa* 2015;20(2):81-86. doi: <http://dx.doi.org/10.1080/16089677.2015.1056468>  
16  
17  
18  
19  
20  
21  
22  
23  
24  
25  
26  
27  
28  
29  
30  
31  
32  
33  
34  
35  
36  
37  
38  
39  
40  
41  
42  
43  
44  
45  
46  
47  
48  
49  
50  
51  
52  
53  
54  
55  
56  
57  
58  
59  
60

**Table 1: Clinical and socio-demographic characteristics of patients with type 2 diabetes at a specialised Diabetes clinic in Gaborone (N= 500)**

| Characteristics                                | All (N=500)       | Males (n= 170)     | Females (n= 330)    | p-value |
|------------------------------------------------|-------------------|--------------------|---------------------|---------|
| Mean age (SD), years                           | 58.9 (12.2)       | 55.4 (12.6)        | 60.8(11.6)          | <0.001  |
| Age <50 years n (%)                            | 109(21.80)        | 57 (33.5)          | 52 (15.8)           | <0.001  |
| Age ≥ 50 years n (%)                           | 391 (78.20)       | 113 (66.5)         | 278(84.2)           |         |
| Diabetes duration, median, IQR,years           | 6 (2 - 13)        | 6.5 (2 - 14)       | 6 (2.5 - 13)        | 0.927   |
| HbA1c mean (SD), %                             | 8.4 (2.4)         | 8.6 (2.7)          | 8.4 (2.4)           | 0.199   |
| Diabetes treatment                             |                   |                    |                     |         |
| Diet alone n (%)                               | 11(2.2)           | 3(1.8)             | 8 (2.4)             |         |
| Insulin alone n (%)                            | 68 (13.6)         | 38(22.3)           | 30 (9.1)            | 0.001   |
| OHA alone n (%)                                | 271(54.2)         | 82(48.2)           | 189 (57.3)          |         |
| Insulin and OHA                                | 150 (30.0)        | 47(27.7)           | 103(31.2)           |         |
| BMI, mean (SD) kg/m <sup>2</sup>               | 30.5(6.0)         | 28.7(5.2)          | 31.4(6.2)           | <0.001  |
| Normal weight n (%)                            | 93 (18.7)         | 46(27.1)           | 49 (14.9)           | <0.001  |
| Overweight n (%)                               | 155(31.1)         | 61(36.3)           | 94 (28.5)           |         |
| Obese n (%)                                    | 250(50.2)         | 63 (37.1)          | 187(56.7)           |         |
| Marital status                                 |                   |                    |                     |         |
| Living alone n (%)                             | 266 (53.20)       | 55 (32.4)          | 211(63.9)           | <0.001  |
| Living with a partner n (%)                    | 234(46.8)         | 115 (67.6)         | 119(36.01)          |         |
| Education status                               |                   |                    |                     |         |
| No formal education, n (%)                     | 77(15.4)          | 26(15.3)           | 51 (15.5)           | <0.001  |
| Primary School, n (%)                          | 229(45.8)         | 56 (32.9)          | 173 (52.4)          |         |
| Secondary school, n (%)                        | 131(26.2)         | 55(32.4)           | 76 (23.0)           |         |
| College/University, n (%)                      | 63(12.6)          | 33 (19.4)          | 30 (9.1)            |         |
| WC, mean (SD), cm                              | 103.3(12.5)       | 101.7 (11.9)       | 104.0 (12.7)        | 0.049   |
| WHR                                            | 0.94(0.10)        | 0.97(0.09)         | 0.93(0.10)          | <0.001  |
| Low WHR n (%)                                  | 75 (44.1)         | 16(4.9)            |                     | <0.001  |
| High WHR n (%)                                 | 95 (55.9)         | 314(95.2)          |                     |         |
| CKD n (%)                                      | 54 (10.8)         | 24 (14.1)          | 30 (9.1)            | 0.086   |
| eGFR, Median, IQR (ml/min/1.73m <sup>2</sup> ) | 112.5(84.3-138.1) | 113.1(80.8 -139.5) | 112.3(84.4 - 137.9) | 0.737   |
| Cholesterol, mean (SD), mmol/L                 | 4.4(1.1)          | 4.3(1.2)           | 4.5(1.1)            | 0.030   |
| LDL-C mean (SD), mmol/L                        | 2.8(1.0)          | 2.6(1.0)           | 2.9(1.0)            | 0.006   |
| Proteinuria n (%)                              | 51(10.20)         | 27 (15.9)          | 24(7.27)            | 0.003   |
| Hypertension n (%)                             | 404 (80.80)       | 120 (70.59)        | 284(86.06)          | <0.001  |
| Dyslipidaemia n (%)                            | 358 (71.60)       | 114 (67.06)        | 244(73.94)          | 0.106   |

**Legend:** DM - Diabetes mellitus; WC- waist circumference; BMI- Body Mass Index; SD- standard deviation; IQR – interquartile range; eGFR- estimated glomerular filtration rate; LDL-C – Low-density lipoprotein; WHR – Waist-hip ratio, HbA1c- Haemoglobin A1c; CKD- Chronic kidney disease; OHA – oral hypoglycaemic agent

**Table 2: Factors associated with optimal glycaemic control among patients with type 2 diabetes at a specialised diabetes clinic in Gaborone (N= 500)**

| Characteristic                     | Unadjusted OR (95% CI) | p-value          | Adjusted OR (95%CI) | p-value      |
|------------------------------------|------------------------|------------------|---------------------|--------------|
| Age group                          |                        |                  |                     |              |
| > 50 years                         | 1                      |                  |                     |              |
| ≤ 50 years                         | 2.16(1.29 - 3.61)      | <b>0.003</b>     | 5.79 (1.08 - 31.14) | <b>0.041</b> |
| Diabetes duration, years           | 0.97(0.95 - 0.99)      | <b>0.040</b>     | 0.91 (0.85 - 0.98)  | <b>0.011</b> |
| Use of Insulin alone               |                        |                  |                     |              |
| No                                 | 1                      |                  |                     |              |
| Yes                                | 0.80(0.45- 1.43)       | 0.590            |                     |              |
| Use of OHA alone                   |                        |                  |                     |              |
| No                                 | 1                      |                  |                     |              |
| Yes                                | 2.785 (1.862 - 4.167)  | <b>&lt;0.001</b> | 0.90 (0.46 - 1.74)  | 0.745        |
| Use of Insulin plus OHA            |                        |                  |                     |              |
| No                                 | 1                      |                  |                     |              |
| Yes                                | 0.185 (0.124 - 0.356)  | <b>&lt;0.001</b> | 0.34 (0.07 - 1.70)  | 0.188        |
| BMI                                | 0.99(0.96 - 1.02)      | 0.427            | –                   | –            |
| Normal weight                      | 1                      | –                | –                   | –            |
| Overweight                         | 1.10 (0.64 - 1.90)     | 0.721            | –                   | –            |
| Obese                              | 0.83(0.50 - 1.39)      | 0.476            | –                   | –            |
| Gender                             |                        |                  |                     |              |
| Men                                | 1                      | –                | –                   | –            |
| Women                              | 0.92(0.62 - 1.36)      | 0.663            | 0.42 (0.14 - 1.25)  | 0.120        |
| Education status                   |                        |                  |                     |              |
| None                               | 1                      | 1                | –                   | –            |
| Primary School                     | 1.58(0.88 - 2.81)      | 0.124            | –                   | –            |
| Secondary school                   | 1.14 (0.60 - 2.16)     | 0.687            | –                   | –            |
| College/University                 | 1.00(0.47 - 2.13)      | 0.996            | –                   | –            |
| Marital status                     |                        |                  |                     |              |
| Living alone                       | 1                      | –                | –                   | –            |
| Living with a partner              | 0.93 (0.64 - 1.36)     | 0.703            | –                   | –            |
| WHR                                | 0.92 (0.13 - 6.58)     | 0.937            | –                   | –            |
| Low WHR                            | 1                      | –                | –                   | –            |
| High WHR                           | 0.92(0.57 - 1.50)      | 0.745            | –                   | –            |
| Weight, kg                         | 0.99 (0.98 - 1.01)     | 0.298            | –                   | –            |
| eGFR, (ml/min/1.73m <sup>2</sup> ) | 1.00 (0.99 - 1.00)     | 0.074            | 1.00(0.99 - 1.01)   | 0.766        |
| CKD                                |                        |                  |                     |              |
| No                                 | 1                      |                  |                     |              |
| Yes                                | 1.053 (0.578 - 1.920)  | 0.866            | –                   | –            |
| Proteinuria                        |                        |                  |                     |              |
| No                                 | 1                      |                  | –                   | –            |
| Yes                                | 1.16(0.63 - 2.14)      | 0.624            | –                   | –            |
| Optimal hypertension control       |                        |                  |                     |              |
| No                                 | 1                      |                  | –                   | –            |
| Yes                                | 2.53 (1.63 - 3.93)     | <b>&lt;0.001</b> | 1.61(0.63 - 4.13)   | 0.322        |
| Optimal LDL-C control              |                        |                  |                     |              |
| No                                 | 1                      |                  |                     |              |
| Yes                                | 2.10 (0.90 - 4.88)     | 0.086            | 2.20 (0.64 - 7.57)  | 0.209        |

1  
2  
3 **Legend:** Legend: BMI- Body Mass Index; CKD- Chronic kidney disease; DM - Diabetes mellitus; eGFR- estimated glomerular  
4 filtration rate; IQR – interquartile range; LDL-C – Low-density lipoprotein; OHA – oral hypoglycaemic agent; SD- standard  
5 deviation; WHR – Waist-hip ratio.  
6  
7  
8  
9  
10  
11  
12  
13  
14  
15  
16  
17  
18  
19  
20  
21  
22  
23  
24  
25  
26  
27  
28  
29  
30  
31  
32  
33  
34  
35  
36  
37  
38  
39  
40  
41  
42  
43  
44  
45  
46  
47  
48  
49  
50  
51  
52  
53  
54  
55  
56  
57  
58  
59  
60

For peer review only

**Table 3: Factors associated with optimal hypertension control among patients with type 2 diabetes at a specialised diabetes clinic in Gaborone (N= 500)**

| Characteristic                     | Unadjusted OR (95% CI) | p-value       | Adjusted OR (95% CI) | p-value      |
|------------------------------------|------------------------|---------------|----------------------|--------------|
| Age group                          |                        |               |                      |              |
| < 50 years                         | 1                      | –             | –                    | –            |
| ≥50 years                          | 0.89(0.48 - 1.62)      | 0.691         | –                    | –            |
| Diabetes duration, years           | 0.97(0.94 - 0.99)      | <b>0.023</b>  | 0.98 (0.92 - 1.03)   | 0.352        |
| Use of Insulin alone               |                        |               |                      |              |
| No                                 | 1                      | –             | –                    | –            |
| Yes                                | 0.45 (0.24 - 0.82)     | <b>0.009</b>  | 1.15 (0.30 - 4.44)   | 0.837        |
| Use of OHA alone                   |                        |               |                      |              |
| No                                 | 1                      | –             | –                    | –            |
| Yes                                | 1.94 (1.30 - 2.91)     | <b>0.001</b>  | 1.37 (0.51 - 3.66)   | 0.531        |
| Use of Insulin plus OHA            |                        |               |                      |              |
| No                                 | 1                      | –             | –                    | –            |
| Yes                                | 0.59 (0.40 - 0.95)     | <b>0.028*</b> | –                    | –            |
| BMI, kg/m <sup>2</sup>             | 0.98 (0.94 - 1.01)     | 0.149         | 0.93(0.86 - 1.01)    |              |
| Normal weight                      | 1                      | –             | –                    | –            |
| Overweight                         | 0.79 (0.42 - 1.47)     | 0.449         | –                    | –            |
| Obese                              | 0.77(0.44 -1.38)       | 0.384         | –                    | –            |
| Gender                             |                        |               |                      |              |
| Men                                | 1                      | –             | –                    | –            |
| Women                              | 1.43(0.92 - 2.22)      | 0.117         | 0.97 (0.36 - 2.61)   | 0.949        |
| Marital                            |                        |               |                      |              |
| Living alone                       | 1                      | –             | –                    | –            |
| Living with a partner              | 0.68 (0.61 - 1.37)     | 0.67          | –                    | –            |
| Education status                   |                        |               |                      |              |
| No formal education                | 1                      | –             | –                    | –            |
| Primary School                     | 1.03(0.58 - 1.83)      | 0.09          | –                    | –            |
| Secondary school                   | 1.08(0.56 - 2.09)      | 0.22          | –                    | –            |
| College/University                 | 0.89(0.41 - 1.92)      | 0.761         | –                    | –            |
| WHR                                | 1.29 (0.14 - 12.00)    | 0.821         | –                    | –            |
| Low WHR                            | 1                      | –             | –                    | –            |
| High WHR                           | 1.18 (0.65 - 2.12)     | 0.589         | –                    | –            |
| eGFR, (ml/min/1.73m <sup>2</sup> ) | 1.00 (1.00 - 1.01)     | 0.139         | 1.00(0.99 -1.02)     | 0.412        |
| Total serum Cholesterol            | 0.964 (0.80 - 1.16)    | 0.693         | –                    | –            |
| Proteinuria                        |                        |               |                      |              |
| No                                 | 1                      | –             | –                    | –            |
| Yes                                | 0.48(0.26 - 0.92)      | <b>0.027</b>  | 0.36(0.07 - 1.80)    | 0.213        |
| Use of CCB                         |                        |               |                      |              |
| No                                 | 1                      | –             | –                    | –            |
| Yes                                | 0.73(0.72 - 1.61)      | 0.729         | –                    | –            |
| Use of Thiazides                   |                        |               |                      |              |
| No                                 | 1                      | –             | –                    | –            |
| Yes                                | 1.58(1.06 - 2.37)      | <b>0.026</b>  | 1.44(0.62 - 3.39)    | 0.399        |
| Use of ACE inhibitors              |                        |               |                      |              |
| No                                 | 1                      | –             | –                    | –            |
| Yes                                | 0.64 (0.43 - 0.95)     | <b>0.028</b>  | 0.35(0.14 - 0.85)    | <b>0.020</b> |
| Use of ARB                         |                        |               |                      |              |
| No                                 | 1                      | –             | –                    | –            |
| Yes                                | 0.95(0.57 - 1.58)      | 0.834         | –                    | –            |
| Alpha blocker                      |                        |               |                      |              |



|    |                           |                    |                  |                    |       |
|----|---------------------------|--------------------|------------------|--------------------|-------|
| 1  |                           |                    |                  |                    |       |
| 2  |                           |                    |                  |                    |       |
| 3  | No                        | 1                  | –                | –                  | –     |
| 4  | Yes                       | 0.24(0.09 - 0.68)  | <b>0.007</b>     | 0.76 (0.14 - 4.20) | 0.749 |
| 5  | Beta-blocker              |                    |                  |                    |       |
| 6  | No                        | 1                  | –                | –                  | –     |
| 7  | Yes                       | 0.70 (0.43 - 1.14) | 0.149            | 0.51(0.19 - 1.37)  | 0.184 |
| 8  | Optimal Glycaemic control |                    |                  |                    |       |
| 9  | No                        | 1                  | –                | –                  | –     |
| 10 | Yes                       | 2.53 (1.63- 3.93)  | <b>&lt;0.001</b> | 1.92 (0.71 - 5.23) | 0.201 |
| 11 | Optimal LDL-C control     |                    |                  |                    |       |
| 12 | No                        | 1                  | –                | –                  | –     |
| 13 | Yes                       | 0.55 (0.23 - 1.36) | 0.199            | 0.75 (0.25 - 2.32) | 0.623 |

**Legend:** \* omitted because of collinearity. ACE INHIBITORS – angiotensin-converting-enzyme inhibitor; ARB – Angiotensin II receptor blocker; BMI- Body Mass Index; CCB- Calcium Channel Blockers; DM - Diabetes mellitus; eGFR- estimated glomerular filtration rate; HbA1c- Haemoglobin A1c; IQR – interquartile range; LDL-C – Low-density lipoprotein; OHA – oral hypoglycaemic agent; SD- standard deviation; WHR – Waist-hip ratio.

**Table 4: Factors associated with optimal LDL-C control among patients with type 2 diabetes at a specialised diabetes clinic in Gaborone (N= 500)**

| Characteristic                     | Unadjusted OR (95% CI) | p-value          | Adjusted OR (95% CI) | p-value      |
|------------------------------------|------------------------|------------------|----------------------|--------------|
| Age group                          |                        |                  |                      |              |
| <50 years                          | 1                      |                  | –                    | –            |
| ≥ 50 years                         | 0.56 (0.21 - 1.50)     | 0.249            | –                    | –            |
| Diabetes duration, years           | 1.02(0.97 - 1.06)      | 0.525            |                      | –            |
| Use of Insulin alone               |                        |                  |                      |              |
| No                                 | 1                      | –                | –                    | –            |
| Yes                                | 1.58 (0.56 - 4.46)     | 0.389            | –                    | –            |
| Use of OHA alone                   |                        |                  |                      |              |
| No                                 | 1                      | –                | –                    | –            |
| Yes                                | 0.95 (0.43 - 2.12)     | 0.900            | –                    | –            |
| Use of Insulin plus OHA            |                        |                  |                      |              |
| No                                 | 1                      | –                | –                    | –            |
| Yes                                | 0.83 (0.35 - 1.97)     | 0.664            | –                    | –            |
| BMI                                | 1.00 (0.93 -1.07)      | 0.951            |                      | –            |
| Normal weight                      | 1                      | –                | –                    | –            |
| Overweight                         | 1.43 (0.34 - 5.94)     | 0.624            | –                    | –            |
| Obese                              | 1.27(0.33 - 4.89)      | 0.730            | –                    | –            |
| Gender                             |                        |                  |                      |              |
| Men                                | 1                      | –                | –                    | –            |
| Women                              | 0.2 (0.09 - 0.47)      | <b>&lt;0.001</b> | 0.24(0.09- 0.59)     | <b>0.002</b> |
| Education status                   |                        |                  |                      |              |
| No formal education                | 1                      | 1                | –                    | –            |
| Primary School                     | 0.79 (0.29 - 2.14)     | 0.647            | –                    | –            |
| Secondary school                   | 0.28 (0.07 - 1.20)     | 0.087            | –                    | –            |
| College/University                 | 0.79(0.20 - 3.11)      | 0.731            | –                    | –            |
| Marital status                     |                        |                  |                      |              |
| Living alone                       | 1                      | –                | –                    | –            |
| Living with a partner              | 0.99 (0.44 - 2.20)     | 0.973            | –                    | –            |
| HbA1c                              | 1.00 (0.85 - 0.20)     | 0.917            |                      | –            |
| WHR                                | 7.59(0.19 - 303.60)    | 0.281            | –                    | –            |
| Low WHR                            | 1                      | –                | –                    | –            |
| High WHR                           | 0.31(0.11 – 0.89)      | <b>0.030</b>     | 0.64(0.20 - 2.10)    | 0.463        |
| Proteinuria                        |                        |                  |                      |              |
| No                                 | 1                      | –                | –                    | –            |
| Yes                                | 0.69 (0.14 - 3.27)     | 0.64             | –                    | –            |
| eGFR, (ml/min/1.73m <sup>2</sup> ) | 1.00(0.99 - 1.01)      | 0.878            | –                    | –            |
| CKD                                |                        |                  |                      |              |
| No                                 | 1                      | –                | –                    | –            |
| Yes                                | 1.88(0.73 - 4.83)      | 0.193            | 1.67 (0.61 - 4.58)   | 0.321        |
| Hypertension                       |                        |                  |                      |              |
| No                                 | 1                      | –                | –                    | –            |
| Yes                                | 1.13 (0.30 - 4.23)     | 0.86             | –                    | –            |

**Legend:** BMI- Body Mass Index; CKD- Chronic kidney disease; DM - Diabetes mellitus; eGFR- estimated glomerular filtration rate; IQR – interquartile range; LDL-C – Low-density lipoprotein; OHA – oral hypoglycaemic agent; SD- standard deviation; WHR–Waist-hip ratio

**STROBE 2007 (v4) Statement—Checklist of items that should be included in reports of *cross-sectional studies***

| Section/Topic                | Item # | Recommendation                                                                                                                                                                       | Reported on page # |
|------------------------------|--------|--------------------------------------------------------------------------------------------------------------------------------------------------------------------------------------|--------------------|
| Title and abstract           | 1      | (a) Indicate the study's design with a commonly used term in the title or the abstract                                                                                               | 1                  |
|                              |        | (b) Provide in the abstract an informative and balanced summary of what was done and what was found                                                                                  | 1                  |
| <b>Introduction</b>          |        |                                                                                                                                                                                      |                    |
| Background/rationale         | 2      | Explain the scientific background and rationale for the investigation being reported                                                                                                 | 2                  |
| Objectives                   | 3      | State specific objectives, including any prespecified hypotheses                                                                                                                     | 2                  |
| <b>Methods</b>               |        |                                                                                                                                                                                      |                    |
| Study design                 | 4      | Present key elements of study design early in the paper                                                                                                                              | 2                  |
| Setting                      | 5      | Describe the setting, locations, and relevant dates, including periods of recruitment, exposure, follow-up, and data collection                                                      | 2                  |
| Participants                 | 6      | (a) Give the eligibility criteria, and the sources and methods of selection of participants                                                                                          | 2                  |
| Variables                    | 7      | Clearly define all outcomes, exposures, predictors, potential confounders, and effect modifiers. Give diagnostic criteria, if applicable                                             | 2                  |
| Data sources/<br>measurement | 8*     | For each variable of interest, give sources of data and details of methods of assessment (measurement). Describe comparability of assessment methods if there is more than one group | 2                  |
| Bias                         | 9      | Describe any efforts to address potential sources of bias                                                                                                                            | 2                  |
| Study size                   | 10     | Explain how the study size was arrived at                                                                                                                                            | 2                  |
| Quantitative variables       | 11     | Explain how quantitative variables were handled in the analyses. If applicable, describe which groupings were chosen and why                                                         | 3                  |
| Statistical methods          | 12     | (a) Describe all statistical methods, including those used to control for confounding                                                                                                | 3                  |
|                              |        | (b) Describe any methods used to examine subgroups and interactions                                                                                                                  | 3                  |
|                              |        | (c) Explain how missing data were addressed                                                                                                                                          |                    |
|                              |        | (d) If applicable, describe analytical methods taking account of sampling strategy                                                                                                   |                    |
|                              |        | (e) Describe any sensitivity analyses                                                                                                                                                |                    |
| <b>Results</b>               |        |                                                                                                                                                                                      | 3                  |

|                          |     |                                                                                                                                                                                                                                                                                                                                                                                                               |     |
|--------------------------|-----|---------------------------------------------------------------------------------------------------------------------------------------------------------------------------------------------------------------------------------------------------------------------------------------------------------------------------------------------------------------------------------------------------------------|-----|
| Participants             | 13* | (a) Report numbers of individuals at each stage of study—eg numbers potentially eligible, examined for eligibility, confirmed eligible, included in the study, completing follow-up, and analysed<br>(b) Give reasons for non-participation at each stage<br>(c) Consider use of a flow diagram                                                                                                               | 3   |
| Descriptive data         | 14* | (a) Give characteristics of study participants (eg demographic, clinical, social) and information on exposures and potential confounders<br>(b) Indicate number of participants with missing data for each variable of interest                                                                                                                                                                               | 4   |
| Outcome data             | 15* | Report numbers of outcome events or summary measures                                                                                                                                                                                                                                                                                                                                                          | 4,5 |
| Main results             | 16  | (a) Give unadjusted estimates and, if applicable, confounder-adjusted estimates and their precision (eg, 95% confidence interval). Make clear which confounders were adjusted for and why they were included<br>(b) Report category boundaries when continuous variables were categorized<br>(c) If relevant, consider translating estimates of relative risk into absolute risk for a meaningful time period | 4,5 |
| Other analyses           | 17  | Report other analyses done—eg analyses of subgroups and interactions, and sensitivity analyses                                                                                                                                                                                                                                                                                                                |     |
| <b>Discussion</b>        |     |                                                                                                                                                                                                                                                                                                                                                                                                               |     |
| Key results              | 18  | Summarise key results with reference to study objectives                                                                                                                                                                                                                                                                                                                                                      | 5   |
| Limitations              | 19  | Discuss limitations of the study, taking into account sources of potential bias or imprecision. Discuss both direction and magnitude of any potential bias                                                                                                                                                                                                                                                    | 1   |
| Interpretation           | 20  | Give a cautious overall interpretation of results considering objectives, limitations, multiplicity of analyses, results from similar studies, and other relevant evidence                                                                                                                                                                                                                                    | 8   |
| Generalisability         | 21  | Discuss the generalisability (external validity) of the study results                                                                                                                                                                                                                                                                                                                                         | 8   |
| <b>Other information</b> |     |                                                                                                                                                                                                                                                                                                                                                                                                               |     |
| Funding                  | 22  | Give the source of funding and the role of the funders for the present study and, if applicable, for the original study on which the present article is based                                                                                                                                                                                                                                                 | 8   |

\*Give information separately for cases and controls in case-control studies and, if applicable, for exposed and unexposed groups in cohort and cross-sectional studies.

**Note:** An Explanation and Elaboration article discusses each checklist item and gives methodological background and published examples of transparent reporting. The STROBE checklist is best used in conjunction with this article (freely available on the Web sites of PLoS Medicine at <http://www.plosmedicine.org/>, Annals of Internal Medicine at <http://www.annals.org/>, and Epidemiology at <http://www.epidem.com/>). Information on the STROBE Initiative is available at [www.strobe-statement.org](http://www.strobe-statement.org).
